# Supplementary material for: In Vivo and In Vitro Anti-Arthritic Effects of Cardenolide-Rich and Caffeoylquinic Acid-Rich Fractions of Periploca forrestii
Source: MDPI journal article supplement (doi:10.3390/molecules23081988), 2018-08-09
Supplement: s1 [file s1]

# ***Molecules***

## **In Vivo and In Vitro Anti-Arthritic Effects of Cardenolide-Rich and Caffeoylquinic Acid-Rich Fractions of *Periploca Forrestii***

**Ting Liu<sup>1†</sup>, Xia Wang<sup>2,3†</sup>, Yan-Ling He<sup>2,3</sup>, Yang Wang<sup>2,3</sup>, Li Dong<sup>1</sup>, Xue Ma<sup>2</sup>, Lin Zheng<sup>1</sup>, Chun-Hua Liu<sup>1</sup>, Guang-Cheng Wang<sup>1</sup>, Jiang Zheng<sup>1</sup>, Yan-Yu Lan<sup>2\*</sup>, Yong-Jun Li<sup>2\*</sup>**

<sup>1</sup> State Key Laboratory of Functions and Applications of Medicinal Plants, Key Laboratory of Pharmaceutics of Guizhou Province, Guizhou Medical University, Guiyang, 550004, China; t-liu@163.com (T.L.); dongliz@aliyun.com (D.L.); mailofzl@126.com (L.Z.); liu\_hua139@126.com (C-H.L.); wanggch123@163.com (G-C.W.); zhengseattle@gmail.com (J.Z.)

<sup>2</sup> Engineering Research Center for the Development and Applications of Ethnic Medicines and TCM (Ministry of Education), Guizhou Medical University, Guiyang, 550004, China; wangx5212141@163.com (X.W.); 15285541570@163.com (Y-L.H.); 15180803607@163.com (Y.W.); xuema0111@163.com (X.M.)

<sup>3</sup> School of Pharmacy, Guizhou Medical University, Guiyang, 550004, China

\* Correspondence: yanyu626@126.com (Y-Y.L.); liyongjun026@126.com (Y-J.L.); Tel.: +86-851-84123002 (Y-Y.L.); +86-851-8698468 (Y-J.L.)

† These authors contributed equally to this work.

**Table 1-a Changes of the weight of rats from day0 to 11 ( $\bar{x} \pm s$ ,  $n = 8$ )**

| Groups              | day 0       | day 1        | day 3        | day 5        | day 7        | day 9        | day 11                   |
|---------------------|-------------|--------------|--------------|--------------|--------------|--------------|--------------------------|
| non-treated control | 138.16±8.71 | 163.02±9.64  | 164.05±9.64  | 165.50±9.32  | 184.46±10.16 | 175.20±9.50  | 182.38±6.66              |
| CIA-treated control | 135.91±8.09 | 159.90±12.93 | 159.9±12.93  | 167.30±7.52  | 184.97±12.40 | 172.65±14.37 | 174.16±9.80 <sup>#</sup> |
| TGT (37.5 mg/kg)    | 137.22±9.15 | 165.40±12.07 | 165.40±12.07 | 163.49±12.18 | 184.49±15.31 | 174.67±13.55 | 178.38±9.30              |
| CQAF (125 mg/kg)    | 134.17±7.37 | 159.90±13.60 | 160.90±13.20 | 164.50±12.90 | 187.60±15.30 | 170.85±13.26 | 176.05±8.34              |
| CQAF (250 mg/kg)    | 135.71±6.53 | 157.50±10.80 | 161.00±9.80  | 161.90±10.10 | 182.60±10.90 | 169.92±8.75  | 177.73±4.93              |
| CQAF (500 mg/kg)    | 136.97±8.27 | 156.00±18.70 | 159.30±19.60 | 165.50±19.10 | 179.80±24.40 | 173.37±9.76  | 179.52±6.48              |
| CDLF (125 mg/kg)    | 135.17±8.37 | 161.21±8.22  | 161.21±8.22  | 167.49±9.11  | 185.73±9.26  | 169.85±16.26 | 174.05±8.44              |
| CDLF (250 mg/kg)    | 134.71±6.93 | 157.43±6.06  | 157.43±6.06  | 162.29±6.68  | 181.67±8.44  | 169.72±8.85  | 174.73±3.93              |
| CDLF (500 mg/kg)    | 135.97±8.07 | 156.90±11.51 | 156.90±11.51 | 163.98±11.30 | 183.84±14.72 | 173.37±8.76  | 180.52±4.48              |

**Table 1-b Changes of the weight of rats from day0 to 11 ( $\bar{x} \pm s$ ,  $n = 8$ )**

| Groups              | Groups<br>(mg/kg)   | day 15                    | day 19                    | day 21                     | day 25                     | day 28                     |
|---------------------|---------------------|---------------------------|---------------------------|----------------------------|----------------------------|----------------------------|
| non-treated control | non-treated control | 205.53±8.09               | 235.25±9.08               | 240.62±10.88               | 251.89±12.07               | 263.63±10.63               |
| CIA-treated control | CIA-treated control | 196.47±11.05 <sup>#</sup> | 217.43±9.99 <sup>##</sup> | 216.21±14.26 <sup>##</sup> | 220.82±21.53 <sup>##</sup> | 211.04±35.17 <sup>##</sup> |
| TGT (37.5 mg/kg)    | TGT (37.5)          | 201.49±13.90              | 231.64±14.98 <sup>*</sup> | 230.11±17.42               | 242.66±18.84 <sup>*</sup>  | 247.29±21.10 <sup>*</sup>  |
| CQAF (125 mg/kg)    | CQAF (125)          | 197.23±12.88              | 220.48±18.43              | 215.87±10.24               | 228.54±12.58               | 230.10±16.12 <sup>*</sup>  |
| CQAF (250 mg/kg)    | CQAF (250)          | 200.90±6.39               | 226.47±7.47               | 229.76±7.69                | 235.68±15.72 <sup>*</sup>  | 250.20±6.67 <sup>**</sup>  |
| CQAF (500 mg/kg)    | CQAF (500)          | 203.57±5.84               | 228.85±9.82 <sup>*</sup>  | 233.28±12.59 <sup>*</sup>  | 243.61±15.61 <sup>**</sup> | 258.26±16.02 <sup>**</sup> |
| CDLF (125 mg/kg)    | CDLF (125)          | 193.23±13.88              | 222.48±19.43              | 216.47±13.24               | 230.24±22.58               | 233.10±18.22 <sup>*</sup>  |
| CDLF (250 mg/kg)    | CDLF (250)          | 199.90±5.39               | 228.57±8.47 <sup>*</sup>  | 230.79±7.69 <sup>*</sup>   | 239.99±20.68 <sup>*</sup>  | 255.20±6.97 <sup>**</sup>  |
| CDLF (500 mg/kg)    | CDLF (500)          | 204.27±5.94               | 231.95±12.82 <sup>*</sup> | 237.27±15.89 <sup>**</sup> | 248.91±15.21 <sup>**</sup> | 261.29±26.02 <sup>**</sup> |

Values are represented as the mean  $\pm$  SD ( $n=8$ ). <sup>#</sup> $P<0.05$ , <sup>##</sup>  $P<0.01$  when compared with the non-treated control group; <sup>\*</sup> $P<0.05$ , <sup>\*\*</sup> $P<0.01$  when compared with the CIA-treated control group.

**Table 2. Effects of CDLF and CQAF on hind paw edema in arthritic rats induced by collagen**

| Groups<br>(mg/kg)   | The changes of hind paw edema (mL) |                         |                         |                         |                         |                         |                         |                         |                         |                         |                         |                         |
|---------------------|------------------------------------|-------------------------|-------------------------|-------------------------|-------------------------|-------------------------|-------------------------|-------------------------|-------------------------|-------------------------|-------------------------|-------------------------|
|                     | day 0                              | day 1                   | day 3                   | day 5                   | day 7                   | day 9                   | day 11                  | day 15                  | day 19                  | day 21                  | day 25                  | day 28                  |
| non-treated control | 1.53±0.09                          | 1.54±0.07               | 1.50±0.11               | 1.55±0.09               | 1.61±0.09               | 1.54±0.09               | 1.55±0.05               | 1.54±0.08               | 1.56±0.08               | 1.58±0.07               | 1.55±0.03               | 1.57±0.04               |
| CIA-treated control | 1.54±0.08                          | 2.59±0.21 <sup>##</sup> | 2.25±0.15 <sup>##</sup> | 2.16±0.19 <sup>##</sup> | 2.06±0.09 <sup>##</sup> | 3.45±0.43 <sup>##</sup> | 3.66±0.33 <sup>##</sup> | 3.88±0.23 <sup>##</sup> | 3.91±0.29 <sup>##</sup> | 3.87±0.18 <sup>##</sup> | 4.10±0.15 <sup>##</sup> | 4.08±0.12 <sup>##</sup> |
| TGT (37.5)          | 1.59±0.11                          | 2.55±0.27               | 2.31±0.24               | 2.17±0.22               | 2.12±0.17               | 3.76±0.67               | 3.39±0.58               | 3.09±0.57 <sup>*</sup>  | 2.97±0.44 <sup>**</sup> | 2.97±0.51 <sup>**</sup> | 3.13±0.91 <sup>**</sup> | 2.93±0.48 <sup>**</sup> |
| CQAF (125)          | 1.57±0.06                          | 2.46±0.26               | 2.32±0.40               | 2.06±0.30               | 2.11±0.36               | 3.18±0.66               | 3.49±0.30               | 3.56±0.24               | 3.64±0.21               | 3.74±0.24               | 3.99±0.13               | 3.92±0.13 <sup>*</sup>  |
| CQAF (250)          | 1.49±0.09                          | 2.47±0.24               | 2.29±0.29               | 2.14±0.23               | 2.10±0.24               | 2.96±0.45               | 3.12±0.39               | 2.73±0.30 <sup>*</sup>  | 2.64±0.28 <sup>**</sup> | 2.58±0.28 <sup>**</sup> | 2.44±0.15 <sup>**</sup> | 2.80±0.33 <sup>**</sup> |
| CQAF (500)          | 1.53±0.10                          | 2.55±0.12               | 2.35±0.07               | 2.24±0.18               | 2.11±0.16               | 2.88±0.67               | 2.92±0.56 <sup>*</sup>  | 2.69±0.52 <sup>*</sup>  | 2.71±0.57 <sup>**</sup> | 2.73±0.35 <sup>**</sup> | 2.52±0.49 <sup>**</sup> | 2.52±0.39 <sup>**</sup> |
| CDLF (125)          | 1.51±0.10                          | 2.50±0.16               | 2.46±0.28               | 2.20±0.28               | 2.24±0.21               | 3.61±0.51               | 3.40±0.40               | 3.67±0.36               | 3.68±0.26               | 3.90±0.18               | 3.87±0.21               | 3.88±0.20 <sup>*</sup>  |
| CDLF (250)          | 1.51±0.08                          | 2.54±0.16               | 2.26±0.18               | 2.09±0.20               | 2.02±0.15               | 3.30±0.27               | 3.25±0.34               | 3.05±0.23               | 2.99±0.34 <sup>**</sup> | 2.74±0.27 <sup>**</sup> | 2.75±0.35 <sup>**</sup> | 2.81±0.22 <sup>**</sup> |
| CDLF (500)          | 1.53±0.05                          | 2.39±0.29               | 2.16±0.18               | 1.98±0.20               | 2.02±0.18               | 3.00±0.28               | 3.19±0.24               | 2.94±0.17 <sup>*</sup>  | 2.81±0.26 <sup>**</sup> | 2.70±0.17 <sup>**</sup> | 2.75±0.20 <sup>**</sup> | 2.67±0.12 <sup>**</sup> |

Values are represented as the mean ± SD (*n*=8). <sup>##</sup>*P*<0.01 when compared with the non-treated control group; <sup>\*</sup>*P*<0.05, <sup>\*\*</sup>*P*<0.01 when compared with the CIA-treated control group.

**Table 3. Effects of CDLF and CQAF on serum RF, TNF- $\alpha$ , IL-6, IL-1 $\beta$ , and PGE<sub>2</sub> in the CIA rats ( $n = 8$ )**

| Group               |            | RF<br>(ng/L)                       | TNF- $\alpha$<br>(ng/L)            | IL-6<br>(ng/L)                   | IL-1 $\beta$<br>(ng/L)          | PGE <sub>2</sub><br>(ng/L)         |
|---------------------|------------|------------------------------------|------------------------------------|----------------------------------|---------------------------------|------------------------------------|
| Non-treated control | -          | 158.405 $\pm$ 39.553               | 90.953 $\pm$ 6.256                 | 14.962 $\pm$ 2.726               | 5.298 $\pm$ 0.719               | 184.489 $\pm$ 40.919               |
| CIA-treated control | -          | 320.242 $\pm$ 38.792 <sup>##</sup> | 124.253 $\pm$ 16.238 <sup>##</sup> | 19.619 $\pm$ 1.224 <sup>##</sup> | 6.700 $\pm$ 0.668 <sup>##</sup> | 243.784 $\pm$ 10.426 <sup>##</sup> |
| TGT                 | 37.5 mg/kg | 211.564 $\pm$ 36.506 <sup>**</sup> | 91.614 $\pm$ 7.383 <sup>**</sup>   | 15.425 $\pm$ 2.278 <sup>**</sup> | 5.199 $\pm$ 0.718 <sup>**</sup> | 186.212 $\pm$ 28.079 <sup>**</sup> |
|                     | 125 mg/kg  | 292.285 $\pm$ 31.388 <sup>*</sup>  | 102.201 $\pm$ 11.269 <sup>**</sup> | 17.029 $\pm$ 1.934 <sup>**</sup> | 5.894 $\pm$ 0.696 <sup>**</sup> | 220.118 $\pm$ 18.604 <sup>**</sup> |
| CQAF                | 250 mg/kg  | 211.090 $\pm$ 29.984 <sup>**</sup> | 96.121 $\pm$ 9.893 <sup>**</sup>   | 16.443 $\pm$ 1.808 <sup>**</sup> | 5.712 $\pm$ 0.597 <sup>**</sup> | 207.881 $\pm$ 32.322 <sup>**</sup> |
|                     | 500 mg/kg  | 177.832 $\pm$ 20.065 <sup>**</sup> | 90.916 $\pm$ 12.997 <sup>**</sup>  | 15.807 $\pm$ 1.199 <sup>**</sup> | 5.401 $\pm$ 0.643 <sup>**</sup> | 195.132 $\pm$ 31.437 <sup>**</sup> |
| CDLF                | 125 mg/kg  | 298.744 $\pm$ 54.909 <sup>*</sup>  | 107.901 $\pm$ 9.421 <sup>**</sup>  | 17.629 $\pm$ 1.513 <sup>**</sup> | 6.214 $\pm$ 0.545 <sup>**</sup> | 233.718 $\pm$ 11.111 <sup>*</sup>  |
|                     | 250 mg/kg  | 257.517 $\pm$ 45.910 <sup>**</sup> | 103.021 $\pm$ 7.383 <sup>**</sup>  | 17.043 $\pm$ 0.903 <sup>**</sup> | 6.012 $\pm$ 0.492 <sup>**</sup> | 216.581 $\pm$ 22.107 <sup>**</sup> |
|                     | 500 mg/kg  | 175.539 $\pm$ 52.484 <sup>**</sup> | 95.916 $\pm$ 7.128 <sup>**</sup>   | 16.307 $\pm$ 1.221 <sup>**</sup> | 5.601 $\pm$ 0.719 <sup>**</sup> | 208.332 $\pm$ 10.164 <sup>**</sup> |

The data are presented as the mean  $\pm$  SD. <sup>##</sup> $P < 0.01$  when compared with the non-treated control group;

<sup>\*</sup> $P < 0.05$ , <sup>\*\*</sup> $P < 0.01$  when compared with the CIA-treated control group.

**Table 4. Effects of CDLF and CQAF on serum NO, MDA, and SOD in CIA rats ( $n = 8$ )**

| Group               |            | NO<br>( $\mu$ mol/L)             | MDA<br>( $\mu$ mol/L)           | SOD<br>(%)                       |
|---------------------|------------|----------------------------------|---------------------------------|----------------------------------|
| Non-treated control | -          | 6.479 $\pm$ 0.731                | 5.227 $\pm$ 0.413               | 61.658 $\pm$ 6.626               |
| CIA-treated control | -          | 10.350 $\pm$ 1.219 <sup>##</sup> | 6.805 $\pm$ 0.390 <sup>##</sup> | 45.092 $\pm$ 7.565 <sup>##</sup> |
| TGT                 | 37.5 mg/kg | 6.938 $\pm$ 1.757 <sup>**</sup>  | 5.293 $\pm$ 0.394 <sup>**</sup> | 52.179 $\pm$ 8.663 <sup>**</sup> |
|                     | 125 mg/kg  | 7.553 $\pm$ 1.660 <sup>**</sup>  | 6.214 $\pm$ 0.384               | 48.534 $\pm$ 7.314               |
| CQAF                | 250 mg/kg  | 7.176 $\pm$ 1.052 <sup>**</sup>  | 5.895 $\pm$ 0.407 <sup>*</sup>  | 54.448 $\pm$ 9.716 <sup>**</sup> |
|                     | 500 mg/kg  | 6.396 $\pm$ 1.392 <sup>**</sup>  | 5.522 $\pm$ 0.260 <sup>**</sup> | 63.097 $\pm$ 7.948 <sup>**</sup> |
| CDLF                | 125 mg/kg  | 8.153 $\pm$ 1.369 <sup>**</sup>  | 6.195 $\pm$ 0.467               | 45.784 $\pm$ 4.787               |
|                     | 250 mg/kg  | 7.476 $\pm$ 0.875 <sup>**</sup>  | 5.814 $\pm$ 0.395 <sup>*</sup>  | 52.782 $\pm$ 7.949 <sup>**</sup> |
|                     | 500 mg/kg  | 6.896 $\pm$ 1.223 <sup>**</sup>  | 5.615 $\pm$ 0.522 <sup>*</sup>  | 62.263 $\pm$ 7.666 <sup>**</sup> |

The data are presented as the mean  $\pm$  SD. <sup>##</sup> $P < 0.01$  when compared with the non-treated control group;

<sup>\*</sup> $P < 0.05$ , <sup>\*\*</sup> $P < 0.01$  when compared with the CIA-treated control group.

**Table 5. Effects of CQAF on the mRNA expressions of IL-1 $\beta$ , IL-6, iNOS, and COX-2 in MH7A cells**

| Group               |                | Relative mRNA expression        |                                 |                                 |                                 |
|---------------------|----------------|---------------------------------|---------------------------------|---------------------------------|---------------------------------|
|                     |                | IL-6                            | IL-1 $\beta$                    | iNOS                            | COX-2                           |
| Non-treated control | -              | 0.006 $\pm$ 0.002               | 0.078 $\pm$ 0.005               | 0.016 $\pm$ 0.001               | 0.167 $\pm$ 0.008               |
| TNF- $\alpha$       | 50 ng/mL       | 1.096 $\pm$ 0.190 <sup>##</sup> | 1.359 $\pm$ 0.113 <sup>##</sup> | 1.096 $\pm$ 0.175 <sup>##</sup> | 1.631 $\pm$ 0.127 <sup>##</sup> |
|                     | 100 $\mu$ g/mL | 0.427 $\pm$ 0.038 <sup>**</sup> | 0.970 $\pm$ 0.157 <sup>**</sup> | 0.363 $\pm$ 0.079 <sup>**</sup> | 0.870 $\pm$ 0.046 <sup>**</sup> |
| CQAF                | 200 $\mu$ g/mL | 0.034 $\pm$ 0.003 <sup>**</sup> | 0.330 $\pm$ 0.078 <sup>**</sup> | 0.216 $\pm$ 0.014 <sup>**</sup> | 0.706 $\pm$ 0.099 <sup>**</sup> |
|                     | 400 $\mu$ g/mL | 0.011 $\pm$ 0.001 <sup>**</sup> | 0.204 $\pm$ 0.017 <sup>**</sup> | 0.116 $\pm$ 0.034 <sup>**</sup> | 0.653 $\pm$ 0.016 <sup>**</sup> |

The data are presented as the mean  $\pm$  SD ( $n = 3$ ). <sup>##</sup> $P < 0.01$  when compared with the non-treated control group; <sup>\*\*</sup> $P < 0.01$  when compared with the TNF- $\alpha$  group.

**Table 6. Effects of CDLF on the mRNA expressions of IL-1 $\beta$ , IL-6, iNOS, and COX-2 in MH7A cells**

| Group               |                | Relative mRNA expressions       |                                 |                                 |                                 |
|---------------------|----------------|---------------------------------|---------------------------------|---------------------------------|---------------------------------|
|                     |                | IL-6                            | IL-1 $\beta$                    | iNOS                            | COX-2                           |
| Non-treated control | -              | 0.007 $\pm$ 0.002               | 0.279 $\pm$ 0.034               | 0.015 $\pm$ 0.003               | 0.023 $\pm$ 0.031               |
| TNF- $\alpha$       | 50 ng/mL       | 1.000 $\pm$ 0.069 <sup>#</sup>  | 1.532 $\pm$ 0.065 <sup>#</sup>  | 1.000 $\pm$ 0.043 <sup>#</sup>  | 1.631 $\pm$ 0.114 <sup>#</sup>  |
|                     | 100 $\mu$ g/mL | 0.531 $\pm$ 0.085 <sup>**</sup> | 1.000 $\pm$ 0.016 <sup>**</sup> | 0.735 $\pm$ 0.036 <sup>**</sup> | 0.591 $\pm$ 0.117 <sup>**</sup> |
| CDLF                | 200 $\mu$ g/mL | 0.034 $\pm$ 0.015 <sup>**</sup> | 0.806 $\pm$ 0.149 <sup>**</sup> | 0.633 $\pm$ 0.028 <sup>**</sup> | 0.585 $\pm$ 0.029 <sup>**</sup> |
|                     | 400 $\mu$ g/mL | 0.019 $\pm$ 0.003 <sup>**</sup> | 0.679 $\pm$ 0.082 <sup>**</sup> | 0.112 $\pm$ 0.005 <sup>**</sup> | 0.221 $\pm$ 0.054 <sup>**</sup> |

The data are presented as the mean  $\pm$  SD ( $n = 3$ ). <sup>#</sup> $P < 0.01$  when compared with the non-treated control group; <sup>\*\*</sup> $P < 0.01$  when compared with the TNF- $\alpha$  group.

**Table 7. Effects of CQAF on protein expressions of iNOS and COX-2 in MH7A cells ( $n = 3$ )**

| Group               |                | Relative density                |                                 |
|---------------------|----------------|---------------------------------|---------------------------------|
|                     |                | iNOS                            | COX-2                           |
| Non-treated control | -              | 0.392 $\pm$ 0.018               | 0.249 $\pm$ 0.031               |
| TNF- $\alpha$       | 50 ng/mL       | 0.527 $\pm$ 0.005 <sup>#</sup>  | 0.412 $\pm$ 0.022 <sup>#</sup>  |
|                     | 100 $\mu$ g/mL | 0.271 $\pm$ 0.029 <sup>**</sup> | 0.294 $\pm$ 0.020 <sup>**</sup> |
| CQAF                | 200 $\mu$ g/mL | 0.167 $\pm$ 0.010 <sup>**</sup> | 0.189 $\pm$ 0.009 <sup>**</sup> |
|                     | 400 $\mu$ g/mL | 0.143 $\pm$ 0.009 <sup>**</sup> | 0.143 $\pm$ 0.009 <sup>**</sup> |

The data are presented as the mean  $\pm$  SD. <sup>#</sup> $P < 0.01$  when compared with the non-treated control group; <sup>\*\*</sup> $P < 0.01$  when compared with the TNF- $\alpha$  group.

**Table 8. Effects of CDLF on protein expressions of iNOS and COX-2 in MH7A cells ( $n = 3$ )**

| Group               |                | Relative density                |                                |
|---------------------|----------------|---------------------------------|--------------------------------|
|                     |                | iNOS                            | COX-2                          |
| Non-treated control | -              | 0.380 $\pm$ 0.019               | 0.411 $\pm$ 0.017              |
| TNF- $\alpha$       | 50 ng/mL       | 0.508 $\pm$ 0.016 <sup>#</sup>  | 0.596 $\pm$ 0.021 <sup>#</sup> |
|                     | 100 $\mu$ g/mL | 0.425 $\pm$ 0.019 <sup>**</sup> | 0.445 $\pm$ 0.003 <sup>*</sup> |
| CDLF                | 200 $\mu$ g/mL | 0.428 $\pm$ 0.002 <sup>**</sup> | 0.424 $\pm$ 0.005 <sup>*</sup> |
|                     | 400 $\mu$ g/mL | 0.411 $\pm$ 0.032 <sup>**</sup> | 0.441 $\pm$ 0.034 <sup>*</sup> |

The data are presented as the mean  $\pm$  SD. <sup>#</sup> $P < 0.01$  when compared with the non-treated control group; <sup>\*</sup> $P < 0.05$ , <sup>\*\*</sup> $P < 0.01$  when compared with the TNF- $\alpha$  group.

**Table 9. Effects of CAQF on the expression of the p65 protein and I $\kappa$ B phosphorylation ( $n = 3$ )**

| Group               |                | Relative density                               |                                |
|---------------------|----------------|------------------------------------------------|--------------------------------|
|                     |                | p-I $\kappa$ B $\alpha$ /I $\kappa$ B $\alpha$ | P65                            |
| Non-treated control | -              | 1.109 $\pm$ 0.029                              | 1.387 $\pm$ 0.015              |
| TNF- $\alpha$       | 50 ng/mL       | 2.175 $\pm$ 0.096 <sup>#</sup>                 | 2.050 $\pm$ 0.017 <sup>#</sup> |
|                     | 100 $\mu$ g/mL | 1.808 $\pm$ 0.185 <sup>**</sup>                | 1.628 $\pm$ 0.095 <sup>*</sup> |
| CAQF                | 200 $\mu$ g/mL | 1.518 $\pm$ 0.026 <sup>**</sup>                | 1.296 $\pm$ 0.006 <sup>*</sup> |
|                     | 400 $\mu$ g/mL | 0.811 $\pm$ 0.041 <sup>**</sup>                | 0.752 $\pm$ 0.061 <sup>*</sup> |

The data are presented as the mean  $\pm$  SD ( $n = 3$ ). <sup>#</sup> $P < 0.01$  when compared with the non-treated control group; <sup>\*</sup> $P < 0.05$ , <sup>\*\*</sup> $P < 0.01$  when compared with the TNF- $\alpha$  group.

**Table 10. Effects of CDLF on the expression of the p65 protein and I $\kappa$ B phosphorylation ( $n = 3$ )**

| Group               |                | Relative density                               |                                 |
|---------------------|----------------|------------------------------------------------|---------------------------------|
|                     |                | p-I $\kappa$ B $\alpha$ /I $\kappa$ B $\alpha$ | P65                             |
| Non-treated control | -              | 0.855 $\pm$ 0.037                              | 0.916 $\pm$ 0.022               |
| TNF- $\alpha$       | 50 ng/mL       | 2.346 $\pm$ 0.154 <sup>##</sup>                | 1.864 $\pm$ 0.019 <sup>##</sup> |
|                     | 100 $\mu$ g/mL | 1.085 $\pm$ 0.039 <sup>**</sup>                | 1.799 $\pm$ 0.025               |
| CDLF                | 200 $\mu$ g/mL | 1.293 $\pm$ 0.126 <sup>**</sup>                | 1.847 $\pm$ 0.012               |
|                     | 400 $\mu$ g/mL | 0.828 $\pm$ 0.036 <sup>**</sup>                | 1.783 $\pm$ 0.016               |

The data are presented as the mean  $\pm$  SD ( $n = 3$ ). <sup>##</sup> $P < 0.01$  when compared with the non-treated control group; <sup>\*\*</sup> $P < 0.01$  when compared with the TNF- $\alpha$  group.

**Table 11. Effects of CQAF on the protein expressions of p38, ERK, and JNK phosphorylation in MH7A cells ( $n = 3$ )**

| Group               |                | p-p38/p38<br>(relative density) | p-JNK/JNK<br>(relative density) | p-ERK/ERK<br>(relative density) |
|---------------------|----------------|---------------------------------|---------------------------------|---------------------------------|
|                     |                |                                 |                                 |                                 |
| Non-treated control | -              | 0.551 $\pm$ 0.049               | 0.996 $\pm$ 0.024               | 0.905 $\pm$ 0.017               |
| TNF- $\alpha$       | 50 ng/mL       | 0.847 $\pm$ 0.043 <sup>##</sup> | 1.777 $\pm$ 0.073 <sup>##</sup> | 1.436 $\pm$ 0.030 <sup>##</sup> |
|                     | 100 $\mu$ g/mL | 0.819 $\pm$ 0.077               | 1.277 $\pm$ 0.051 <sup>**</sup> | 1.183 $\pm$ 0.065 <sup>**</sup> |
| CAQF                | 200 $\mu$ g/mL | 0.708 $\pm$ 0.030 <sup>*</sup>  | 1.015 $\pm$ 0.051 <sup>**</sup> | 0.654 $\pm$ 0.018 <sup>**</sup> |
|                     | 400 $\mu$ g/mL | 0.631 $\pm$ 0.015 <sup>**</sup> | 0.736 $\pm$ 0.012 <sup>**</sup> | 0.560 $\pm$ 0.022 <sup>**</sup> |

The data are presented as the mean  $\pm$  SD ( $n = 3$ ). <sup>##</sup> $P < 0.01$  when compared with the non-treated control group; <sup>\*</sup> $P < 0.05$ , <sup>\*\*</sup> $P < 0.01$  when compared with the TNF- $\alpha$  group.

**Table 12. Effects of CDLF on the protein expressions of p38, ERK, and JNK phosphorylation in MH7A cells ( $n = 3$ )**

| Group               |                | p-p38/p38<br>(relative density) | p-JNK/JNK<br>(relative density) | p-ERK/ERK<br>(relative density) |
|---------------------|----------------|---------------------------------|---------------------------------|---------------------------------|
|                     |                |                                 |                                 |                                 |
| Non-treated control | -              | 1.628 $\pm$ 0.183               | 0.746 $\pm$ 0.040               | 0.296 $\pm$ 0.012               |
| TNF- $\alpha$       | 50 ng/mL       | 2.775 $\pm$ 0.040 <sup>##</sup> | 1.071 $\pm$ 0.017 <sup>##</sup> | 0.704 $\pm$ 0.011 <sup>##</sup> |
|                     | 100 $\mu$ g/mL | 2.155 $\pm$ 0.044 <sup>**</sup> | 0.854 $\pm$ 0.021 <sup>**</sup> | 0.551 $\pm$ 0.048 <sup>**</sup> |
| CDLF                | 200 $\mu$ g/mL | 2.134 $\pm$ 0.117 <sup>*</sup>  | 0.901 $\pm$ 0.025 <sup>**</sup> | 0.662 $\pm$ 0.025               |
|                     | 400 $\mu$ g/mL | 1.178 $\pm$ 0.014 <sup>**</sup> | 0.848 $\pm$ 0.063 <sup>**</sup> | 0.477 $\pm$ 0.039 <sup>**</sup> |

The data are presented as the mean  $\pm$  SD ( $n = 3$ ). <sup>##</sup> $P < 0.01$  when compared with Non-treated control group; <sup>\*</sup> $P < 0.05$ , <sup>\*\*</sup> $P < 0.01$  when compared with the TNF- $\alpha$  group.

Table 13. Chemical composition of CDLF

| chemical<br>formula                             | RT<br>(min) | m/z<br>(ESI-) | mass error<br>(ppm) | response<br>(ESI-) | adduct            | m/z<br>(ESI+) | mass error<br>(ppm) | response<br>(ESI+) | adduct         |
|-------------------------------------------------|-------------|---------------|---------------------|--------------------|-------------------|---------------|---------------------|--------------------|----------------|
| C <sub>40</sub> H <sub>66</sub> O <sub>17</sub> | 9.18        | 863.4311      | 3.3                 | 626912             | +HCOO             | 841.4202      | 1.1                 | 116006             | +Na            |
| C <sub>36</sub> H <sub>56</sub> O <sub>13</sub> | 9.29        | 741.3707      | 0.6                 | 159633             | +HCOO, +Cl        | 719.3608      | -0.7                | 12296              | +Na, +K        |
| C <sub>23</sub> H <sub>34</sub> O <sub>6</sub>  | 9.43        | 451.2333      | -0.9                | 201326             | +HCOO, -H         | ND            | ND                  | ND                 | ND             |
| C <sub>23</sub> H <sub>32</sub> O <sub>5</sub>  | 9.63        | 433.223       | -0.5                | 76661              | +HCOO, -H,<br>+Cl | 389.2316      | -1.6                | 125074             | +H, +Na,<br>+K |
| C <sub>40</sub> H <sub>66</sub> O <sub>16</sub> | 9.67        | 847.4353      | 2.4                 | 346887             | +HCOO             | ND            | ND                  | ND                 | ND             |
| C <sub>23</sub> H <sub>34</sub> O <sub>5</sub>  | 9.68        | 435.2386      | -0.5                | 850781             | +HCOO,<br>-H, +Cl | 391.2471      | -2                  | 397796             | +H, +Na,<br>+K |
| C <sub>18</sub> H <sub>34</sub> O <sub>5</sub>  | 10.04       | 329.2331      | -0.8                | 544269             | -H                | ND            | ND                  | ND                 | ND             |
| C <sub>27</sub> H <sub>44</sub> O <sub>6</sub>  | 10.43       | 509.3119      | -0.2                | 128993             | +HCOO             | 487.3029      | -0.2                | 19972              | +Na, +K        |
| C <sub>34</sub> H <sub>52</sub> O <sub>9</sub>  | 11.03       | 649.3606      | 2                   | 354449             | +HCOO, +Cl        | 627.3508      | 0.7                 | 91194              | +Na, +K        |

**Table 14. Chemical composition of CQAF**

| Compound                                   | chemical<br>formula                             | RT<br>(min) | m/z<br>(ESI-) | mass error<br>(ppm) | response<br>(ESI-) | adduct | m/z<br>(ESI+) | mass error<br>(ppm) | response<br>(ESI+) | adduct    |
|--------------------------------------------|-------------------------------------------------|-------------|---------------|---------------------|--------------------|--------|---------------|---------------------|--------------------|-----------|
| Caffeoylquinic acid /isomer                | C <sub>16</sub> H <sub>18</sub> O <sub>9</sub>  | 3.64        | 353.0875      | -0.8                | 105705             | -H     | 355.1014      | -2.6                | 5575               | +H,+Na    |
| Caffeoylquinic acid /isomer                | C <sub>16</sub> H <sub>18</sub> O <sub>9</sub>  | 4.41        | 353.0876      | -0.7                | 283059             | -H     | 355.1017      | -1.8                | 54538              | +H,+Na,+K |
| Caffeoylquinic acid /isomer                | C <sub>16</sub> H <sub>18</sub> O <sub>9</sub>  | 4.56        | 353.0873      | -1.4                | 223765             | -H     | 355.1014      | -2.6                | 11899              | +H,+Na    |
| 3-o-caffeoyl-4-o-sinapoylquinic acid       | C <sub>27</sub> H <sub>28</sub> O <sub>13</sub> | 5.85        | 559.1457      | 0                   | 155297             | -H     | 561.1591      | -2.1                | 15928              | +H        |
| Caffeoylquinic acid ethyl ester<br>/isomer | C <sub>18</sub> H <sub>22</sub> O <sub>9</sub>  | 6.13        | 381.1187      | -1                  | 213130             | -H     | 383.1327      | -2.4                | 23139              | +H        |
| Caffeoylquinic acid ethyl ester<br>/isomer | C <sub>18</sub> H <sub>22</sub> O <sub>9</sub>  | 6.75        | 381.1188      | -0.9                | 324074             | -H     | 383.1331      | -1.6                | 35625              | +H        |
| Caffeoylquinic acid ethyl ester<br>/isomer | C <sub>18</sub> H <sub>22</sub> O <sub>9</sub>  | 7.03        | 381.119       | -0.3                | 553767             | -H     | 383.1329      | -2.1                | 96059              | +H        |

**Table 15. Effects of CDLF or CQAF on the viability of MH7A cells after 24 h treatment (*n* = 6)**

| Group               |           | Cell viability (%) |
|---------------------|-----------|--------------------|
| Non-treated control | -         | 100.00±2.65        |
|                     |           |                    |
| CQAF                | 100 µg/mL | 101.23±3.15        |
|                     | 200 µg/mL | 100.36±2.83        |
|                     | 300 µg/mL | 99.89±3.74         |
|                     | 400 µg/mL | 99.24±3.39         |
|                     | 500 µg/mL | 95.32±0.77*        |
|                     | 600 µg/mL | 93.64±0.89**       |
|                     |           |                    |
| CDLF                | 100 µg/mL | 100.09±0.68        |
|                     | 200 µg/mL | 100.87±1.46        |
|                     | 300 µg/mL | 101.29±2.16        |
|                     | 400 µg/mL | 99.89±0.96         |
|                     | 500 µg/mL | 94.07±1.32**       |
|                     | 600 µg/mL | 92.03±1.62**       |

MH7A cells ( $1 \times 10^4$  cells/well) were seeded in 96-well plates and allowed to adhere for 24 h. The cells were then treated with CDLF or CQAF in doses of 100 µg/mL, 200 µg/mL, 300 µg/mL, 400 µg/mL, 500 µg/mL and 600 µg/mL for 24 h. After treatment, cells were incubated with 10 µL of MTT (Promega, USA) for 2 h, and then the absorbance at 490 nm was measured with a model 680 microplate reader (Bio-rad, USA). The viability was calculated with the following fomula.

$$\text{Cell viability (\%)} = (A_{\text{sample}} - A_{\text{blank}}) / (A_{\text{control}} - A_{\text{blank}}) \times 100\%$$

$A_{\text{sample}}$ : absorbance of CDLF or CQAF group at 490 nm

$A_{\text{control}}$ : absorbance of the none-treated control group at 490 nm

$A_{\text{control}}$ : absorbance of the cultrue medium at 490 nm

The data are presented as the mean ± SD. \* $P < 0.05$ , \*\* $P < 0.01$  when compared with the none-treated control group.

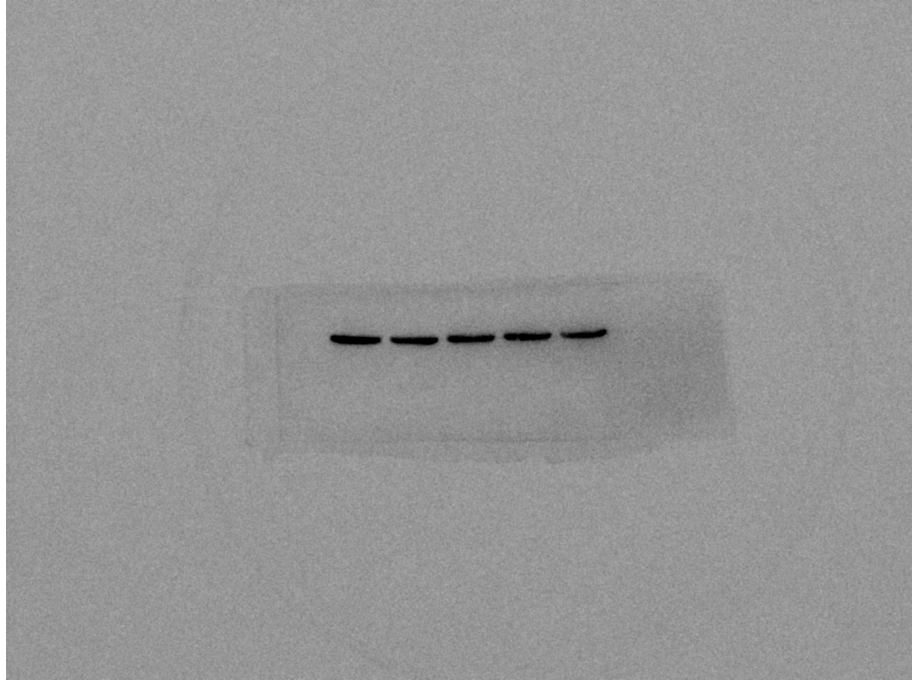

Figure 1. Original western-blot figure of Figure 7 in manuscript. CDFL,  $\beta$ -actin. From left to right: non-treated control group, TNF- $\alpha$  group, CDFL (100  $\mu$ g/mL) group, CDFL (200  $\mu$ g/mL) group, CDFL (400  $\mu$ g/mL) group.

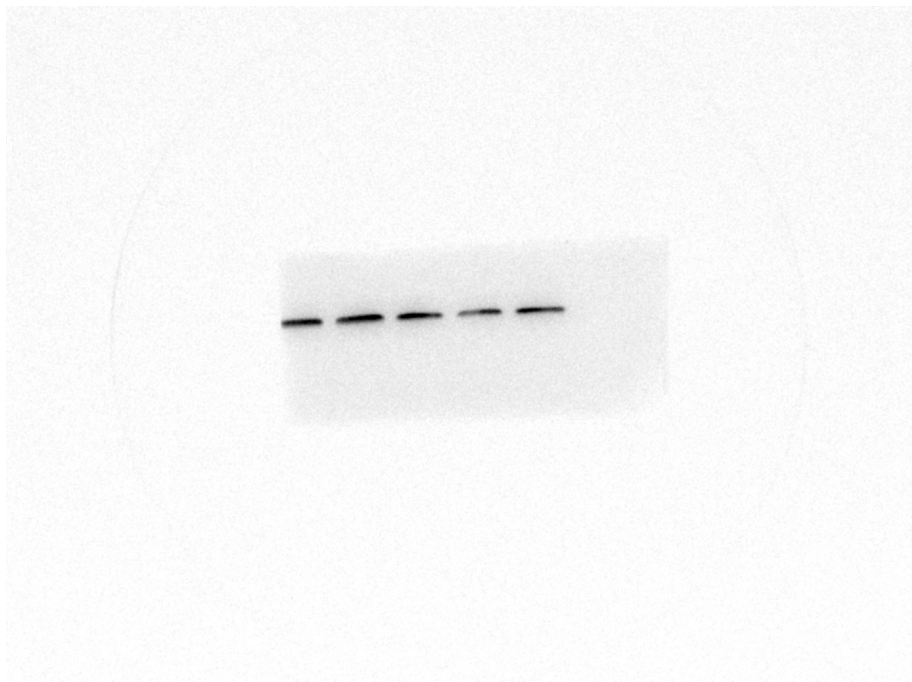

Figure 2. Original western-blot figure of Figure 7 in manuscript. CDFL, COX-2. From left to right: non-treated control group, TNF- $\alpha$  group, CDFL (100  $\mu$ g/mL) group, CDFL (200  $\mu$ g/mL) group, CDFL (400  $\mu$ g/mL) group.

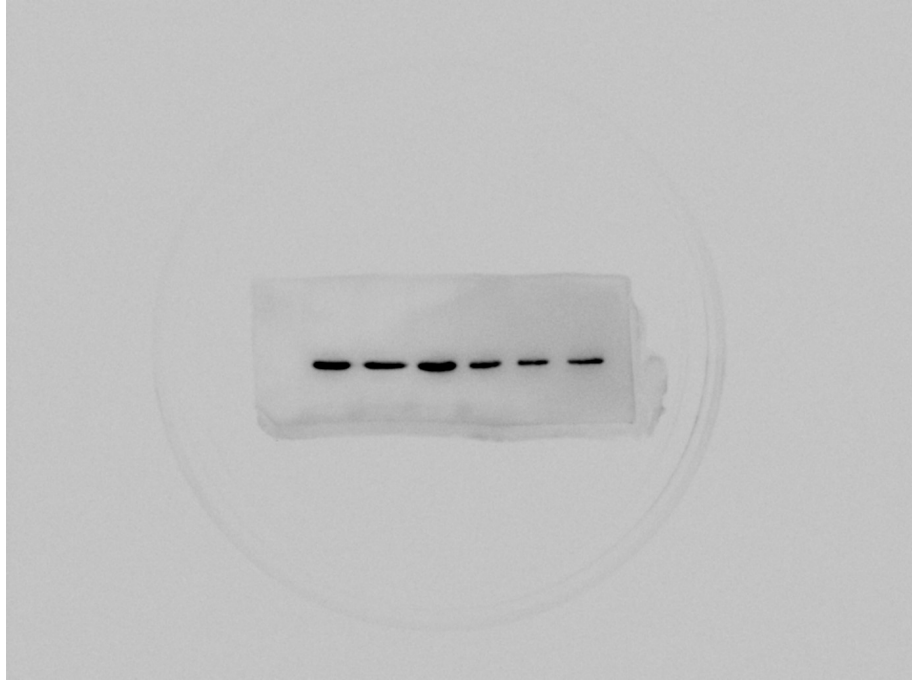

Figure 3. Original western-blot figure of Figure 7 in manuscript. CDFL, iNOS. From left to right: quality control sample, non-treated control group, TNF- $\alpha$  group, CDFL (100  $\mu\text{g/mL}$ ) group, CDFL (200  $\mu\text{g/mL}$ ) group, CDFL (400  $\mu\text{g/mL}$ ) group.

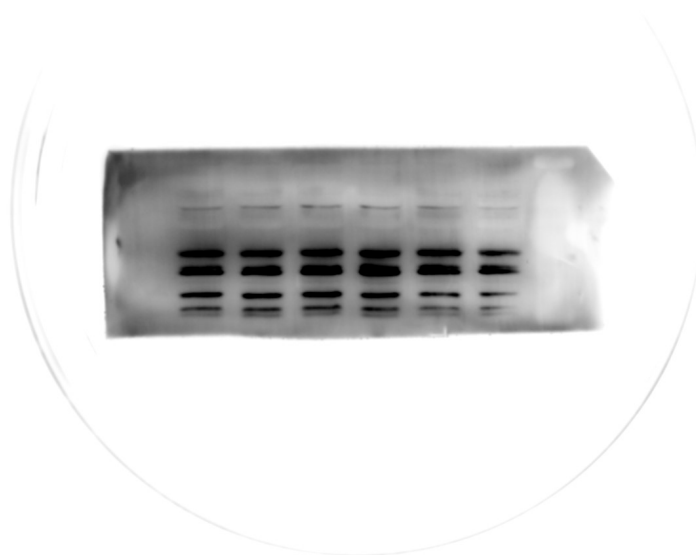

Figure.4 Original western-blot figure of Figure 7 in manuscript. CQAF,  $\beta$ -actin. From left to right: non-treated control group, TNF- $\alpha$  group, CQAF (100  $\mu\text{g/mL}$ ) group, CQAF (200  $\mu\text{g/mL}$ ) group, CQAF (400  $\mu\text{g/mL}$ ) group, quality control sample.

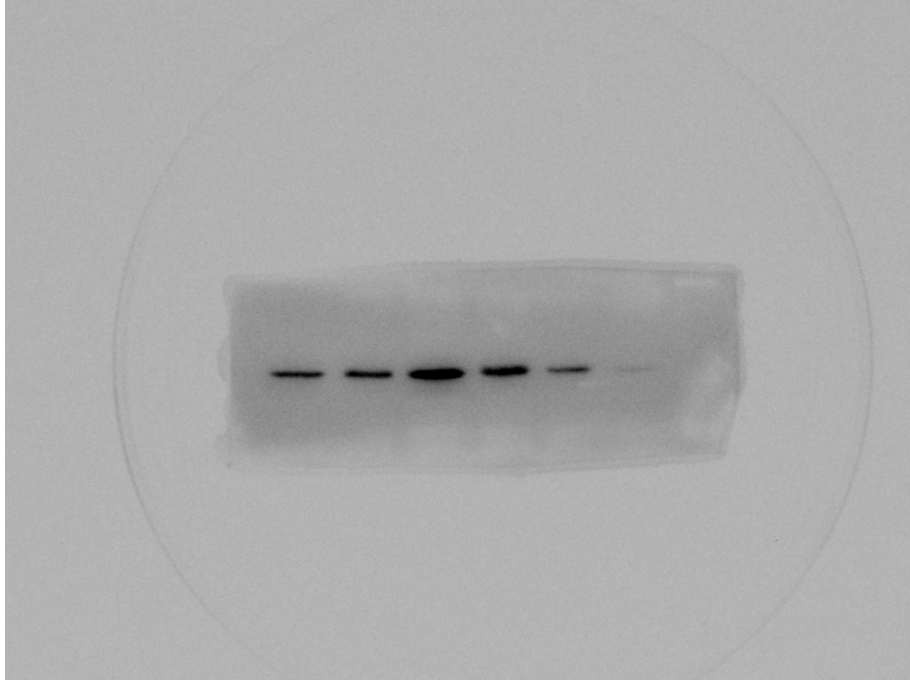

Figure 5. Original western-blot figure of Figure 7 in manuscript. CQAF, COX-2. From left to right: quality control sample, non-treated control group, TNF- $\alpha$  group, CQAF (100  $\mu\text{g/mL}$ ), CQAF (200  $\mu\text{g/mL}$ ), CQAF (400  $\mu\text{g/mL}$ ).

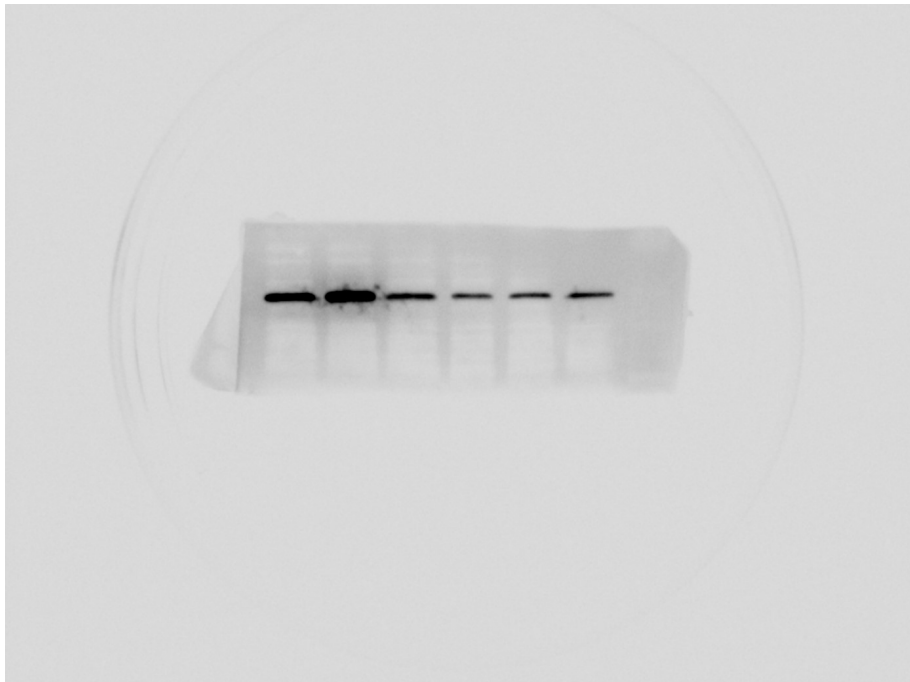

Figure 6. Original western-blot figure of Figure 7 in manuscript. CQAF, iNOS. From left to right: non-treated control group, TNF- $\alpha$  group, CQAF (100  $\mu\text{g/mL}$ ), CQAF (200  $\mu\text{g/mL}$ ), CQAF (400  $\mu\text{g/mL}$ ), quality control sample.

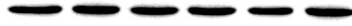

Figure 7. Original western-blot figure of Figure 8 in manuscript. CDFL,  $\beta$ -actin. From left to right: non-treated control group, TNF- $\alpha$  group, CDFL (100  $\mu\text{g/mL}$ ) group, CDFL (200  $\mu\text{g/mL}$ ) group, CDFL (400  $\mu\text{g/mL}$ ) group, quality control sample.

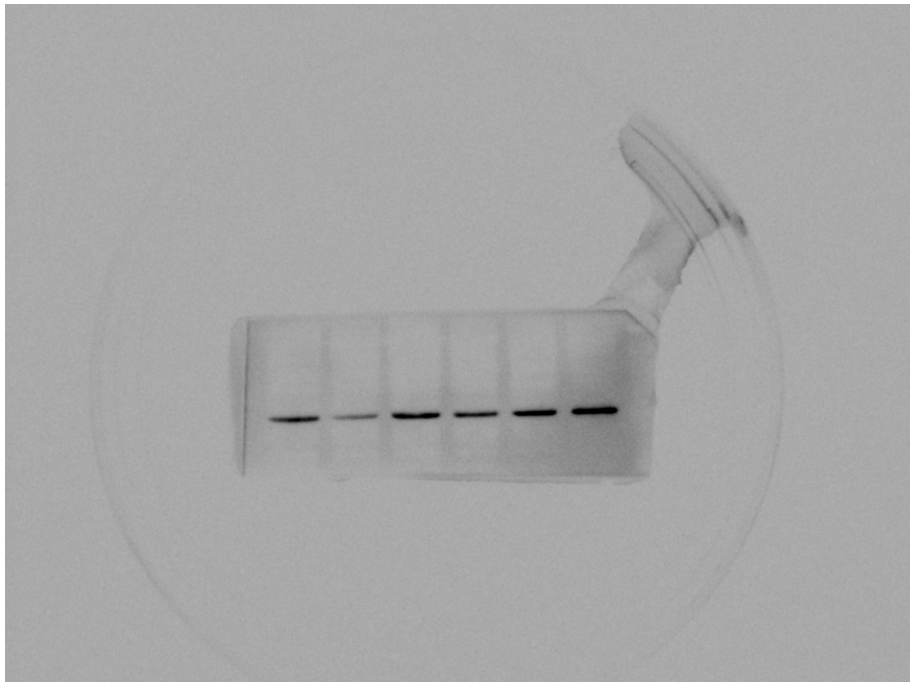

Figure 8. Original western-blot figure of Figure 8 in manuscript. CDFL, I $\kappa$ B $\alpha$ . From left to right: non-treated control group, TNF- $\alpha$  group, CDFL (100  $\mu\text{g/mL}$ ) group, CDFL (200  $\mu\text{g/mL}$ ) group, CDFL (400  $\mu\text{g/mL}$ ) group, quality control sample.

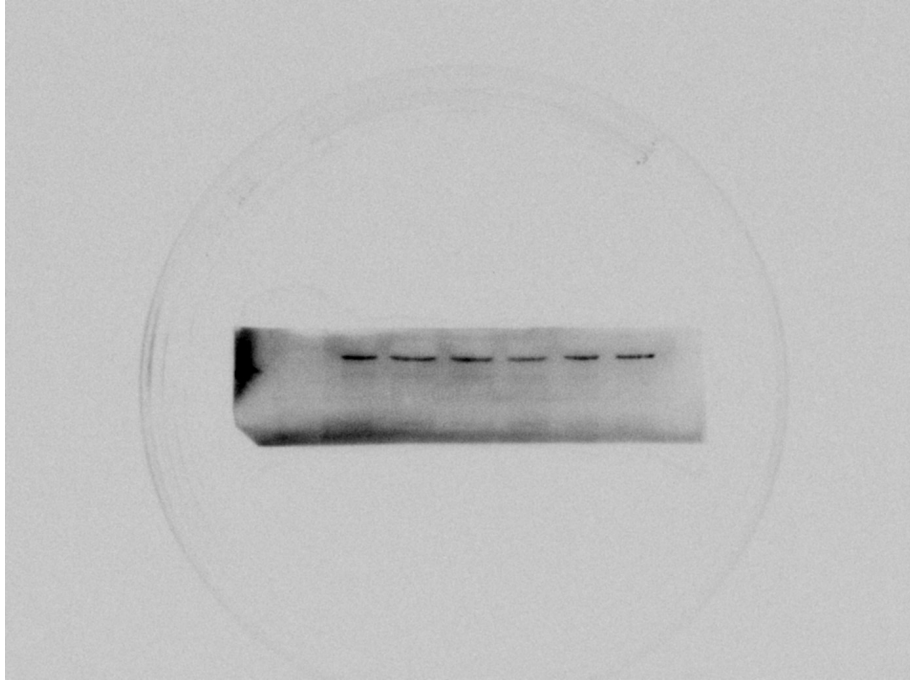

Figure 9. Original western-blot figure of Figure 8 in manuscript. CDFL, p65. From left to right: non-treated control group, TNF- $\alpha$  group, CDFL (100  $\mu\text{g/mL}$ ) group, CDFL (200  $\mu\text{g/mL}$ ) group, CDFL (400  $\mu\text{g/mL}$ ) group, quality control sample.

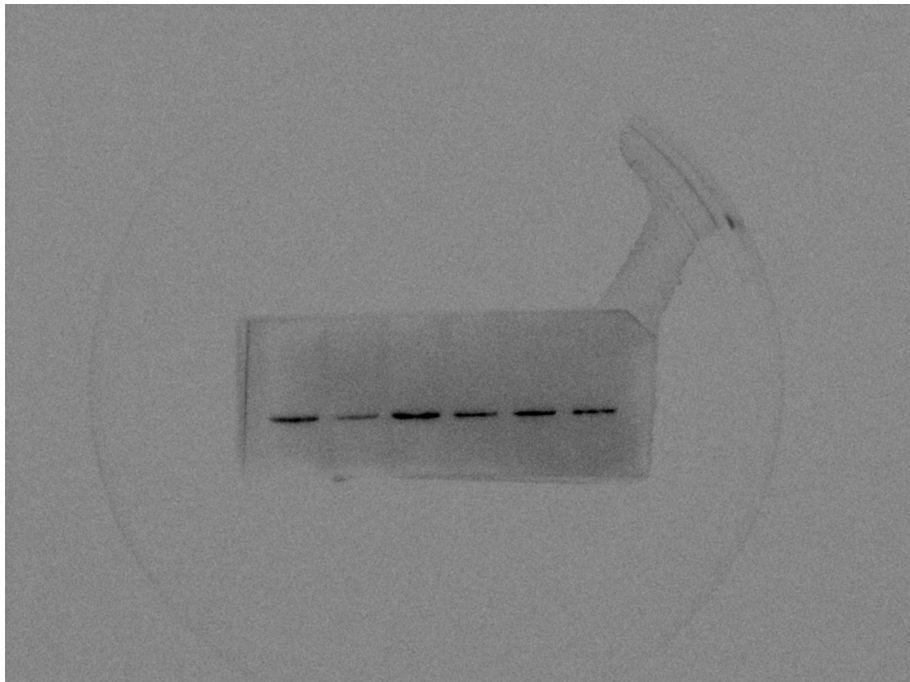

Figure 10. Original western-blot figure of Figure 8 in manuscript. CDFL, p-IkBa. From left to right: quality control sample, non-treated control group, TNF- $\alpha$  group, CDFL (100  $\mu\text{g/mL}$ ) group, CDFL (200  $\mu\text{g/mL}$ ) group, CDFL (400  $\mu\text{g/mL}$ ) group.

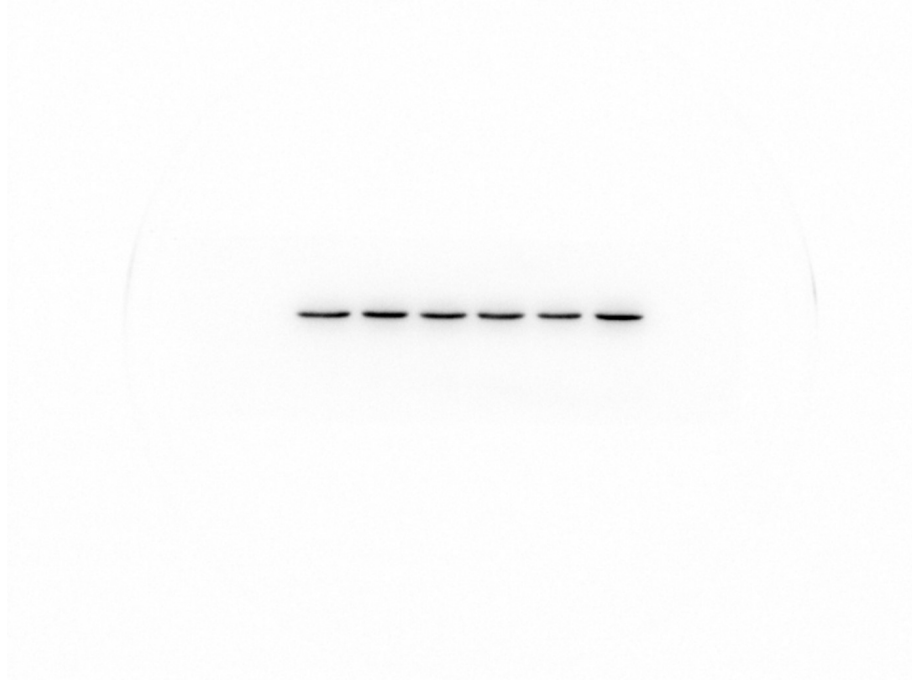

Figure.11. Original western-blot figure of Figure 8 in manuscript. CQAF,  $\beta$ -actin. From left to right: non-treated control group, TNF- $\alpha$  group, CQAF (100  $\mu$ g/mL) group, CQAF (200  $\mu$ g/mL) group, CQAF (400  $\mu$ g/mL) group, quality control sample.

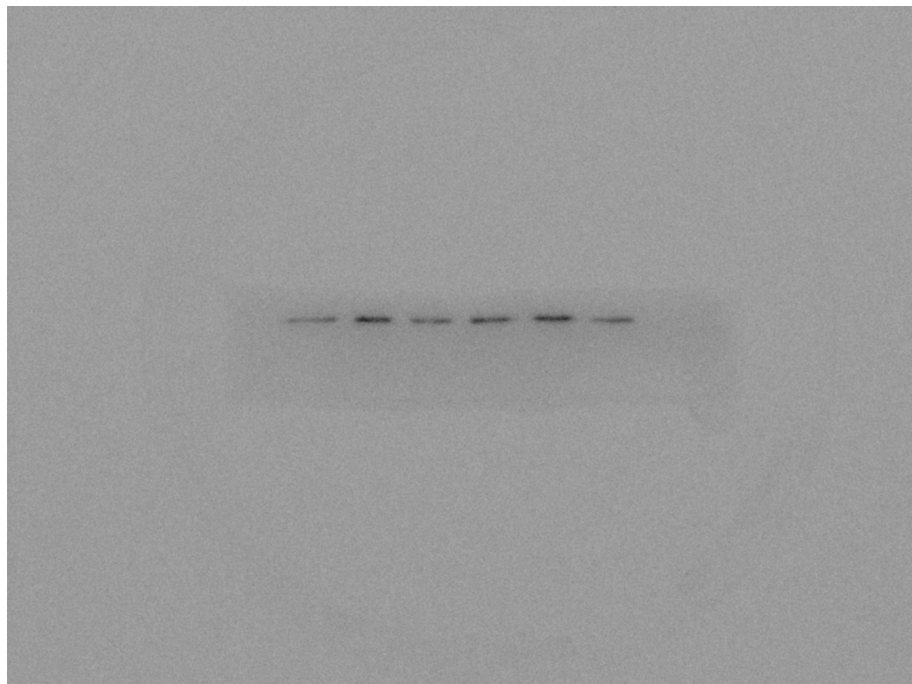

Figure 12. Original western-blot figure of Figure 8 in manuscript. CQAF,  $I\kappa B\alpha$ . From left to right: quality control sample, non-treated control group, TNF- $\alpha$  group, CQAF (100  $\mu$ g/mL) group, CQAF (200  $\mu$ g/mL) group, CQAF (400  $\mu$ g/mL) group.

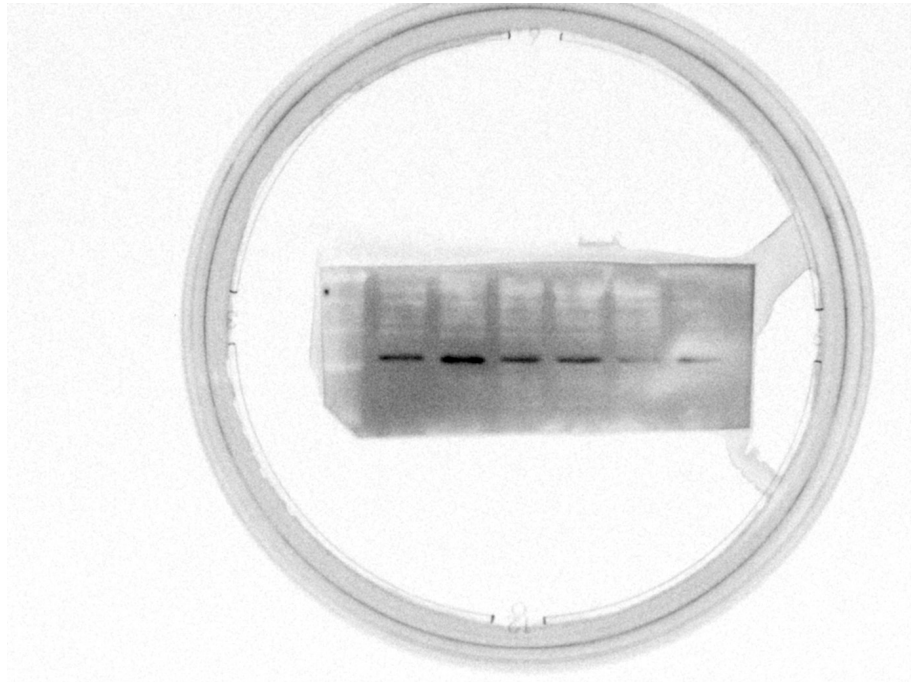

Figure 13. Original western-blot figure of Figure 8 in manuscript. CQAF, p65. From left to right: non-treated control group, TNF- $\alpha$  group, CQAF (100  $\mu\text{g/mL}$ ) group, CQAF (200  $\mu\text{g/mL}$ ) group, CQAF (400  $\mu\text{g/mL}$ ) group, quality control sample.

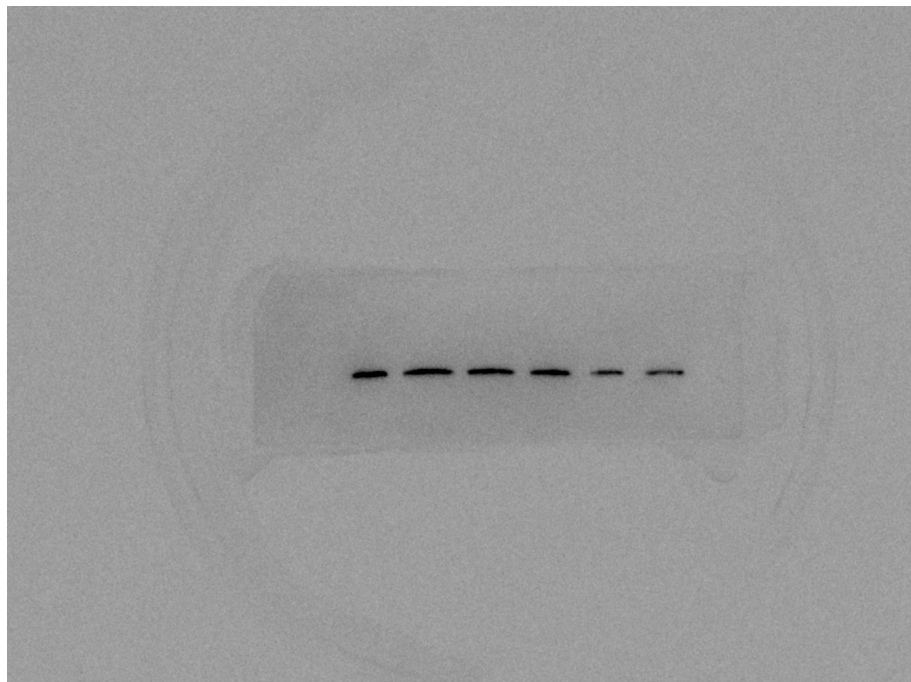

Figure 14 Original western-blot figure of Figure 8 in manuscript. CQAF, p-IkBa. From left to right: non-treated control group, TNF- $\alpha$  group, CQAF (100  $\mu\text{g/mL}$ ) group, CQAF (200  $\mu\text{g/mL}$ ) group, CQAF (400  $\mu\text{g/mL}$ ) group, quality control sample.



Figure 15. Original western-blot figure of Figure 9 in manuscript. CDLF,  $\beta$ -actin. From left to right: non-treated control group, TNF- $\alpha$  group, CDLF (100  $\mu$ g/mL) group, CDLF (200  $\mu$ g/mL) group, CDLF (400  $\mu$ g/mL) group, quality control sample.

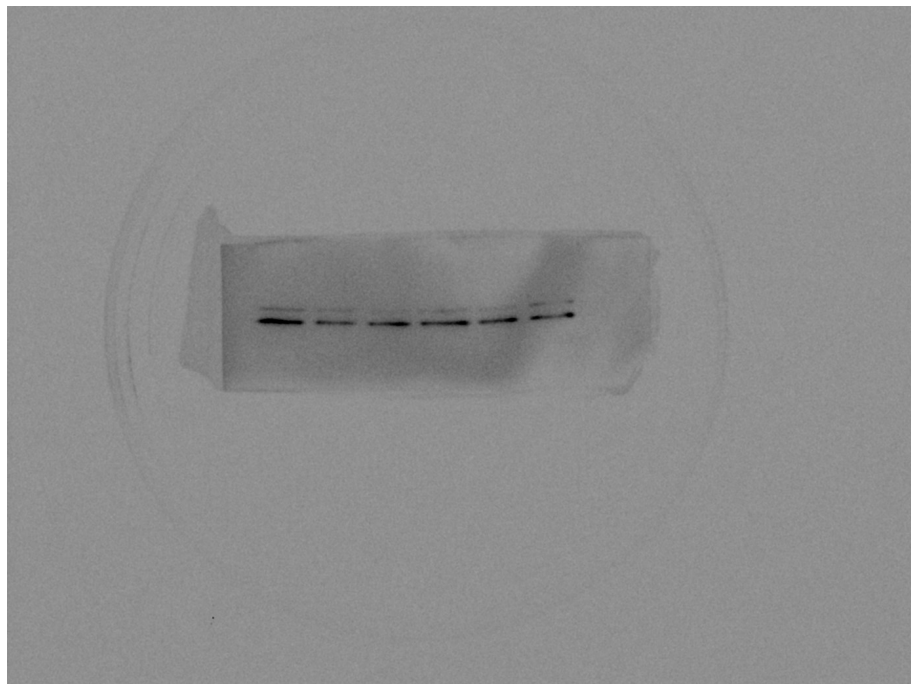

Figure 16. Original western-blot figure of Figure 9 in manuscript. CDLF, ERK<sub>1/2</sub>. From left to right: quality control sample, non-treated control group, TNF- $\alpha$  group, CDLF (100  $\mu$ g/mL) group, CDLF (200  $\mu$ g/mL) group, CDLF (400  $\mu$ g/mL) group.

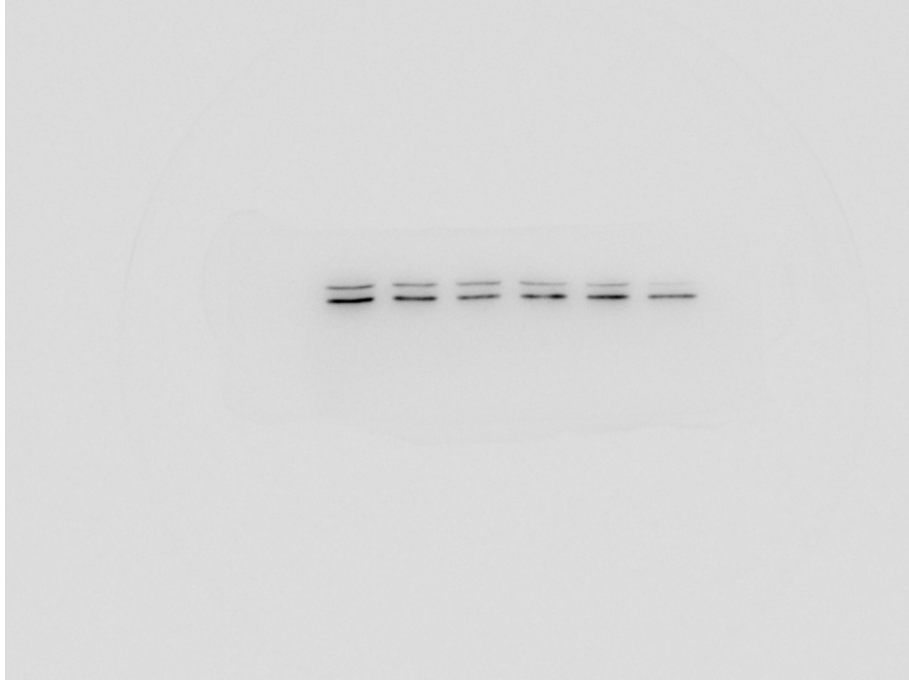

Figure 17. Original western-blot figure of Figure 9 in manuscript. CDLF, JNK. From left to right: quality control sample, non-treated control group, TNF- $\alpha$  group, CDLF (100  $\mu\text{g/mL}$ ) group, CDLF (200  $\mu\text{g/mL}$ ) group, CDLF (400  $\mu\text{g/mL}$ ) group.

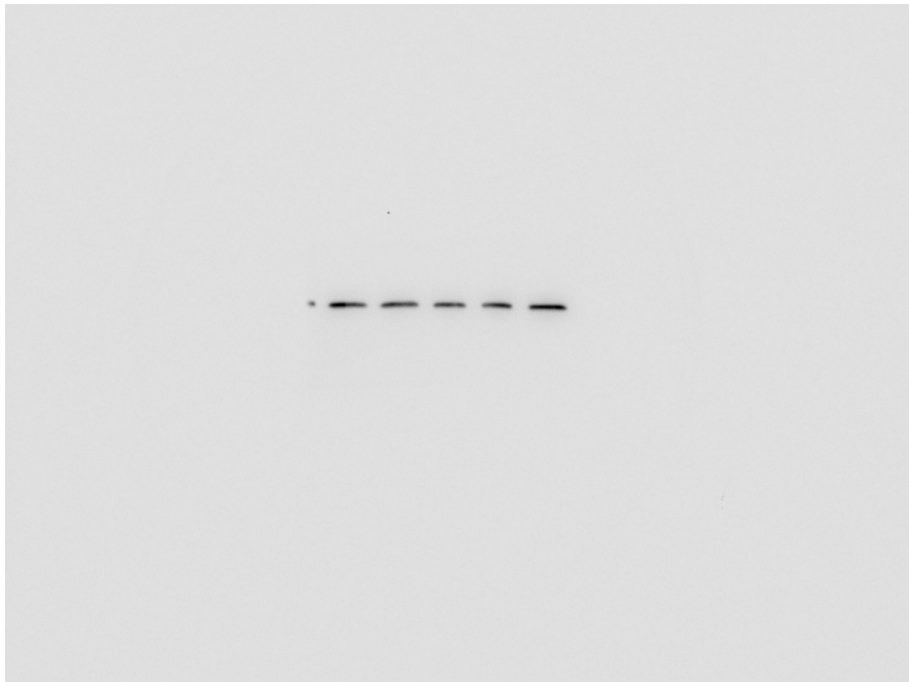

Figure 18. Original western-blot figure of Figure 9 in manuscript. CDLF, p38. From left to right: non-treated control group, TNF- $\alpha$  group, CDLF (100  $\mu\text{g/mL}$ ) group, CDLF (200  $\mu\text{g/mL}$ ) group, CDLF (400  $\mu\text{g/mL}$ ) group.

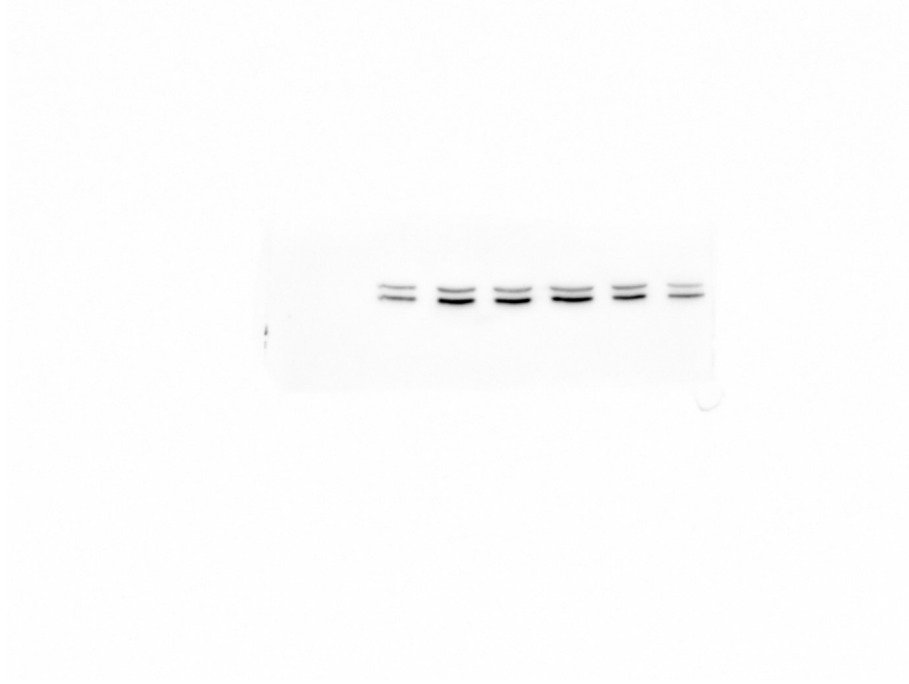

Figure 19 Original western-blot figure of Figure 9 in manuscript. CDLF, p-ERK<sub>1/2</sub>. From left to right: non-treated control group, TNF- $\alpha$  group, CDLF (100  $\mu$ g/mL) group, CDLF (200  $\mu$ g/mL) group, CDLF (400  $\mu$ g/mL) group, quality control sample.

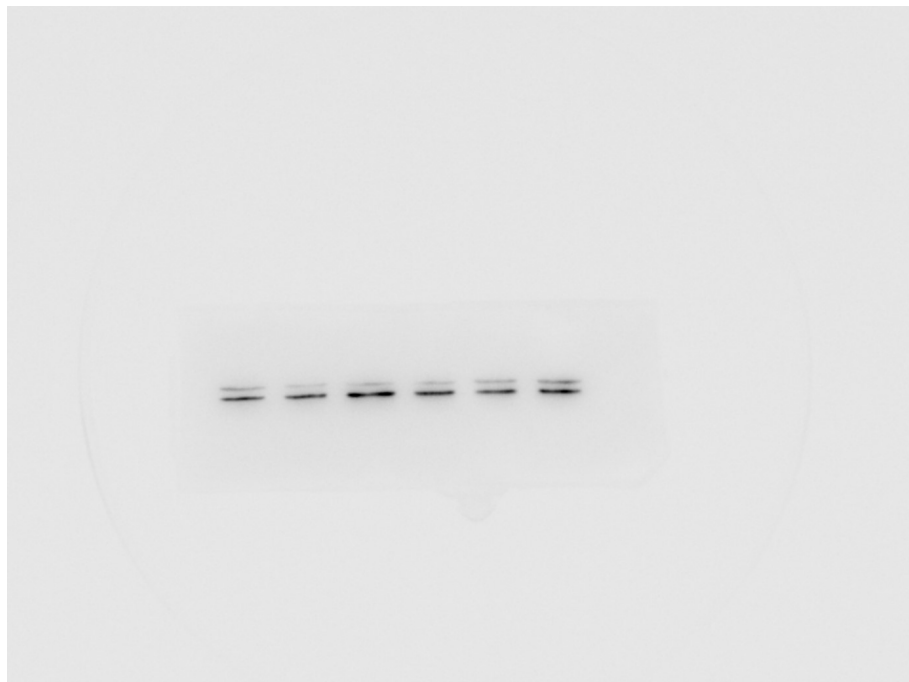

Figure 20. Original western-blot figure of Figure 9 in manuscript. CDLF, p-JNK. From left to right: quality control sample, non-treated control group, TNF- $\alpha$  group, CDLF (100  $\mu$ g/mL) group, CDLF (200  $\mu$ g/mL) group, CDLF (400  $\mu$ g/mL) group.

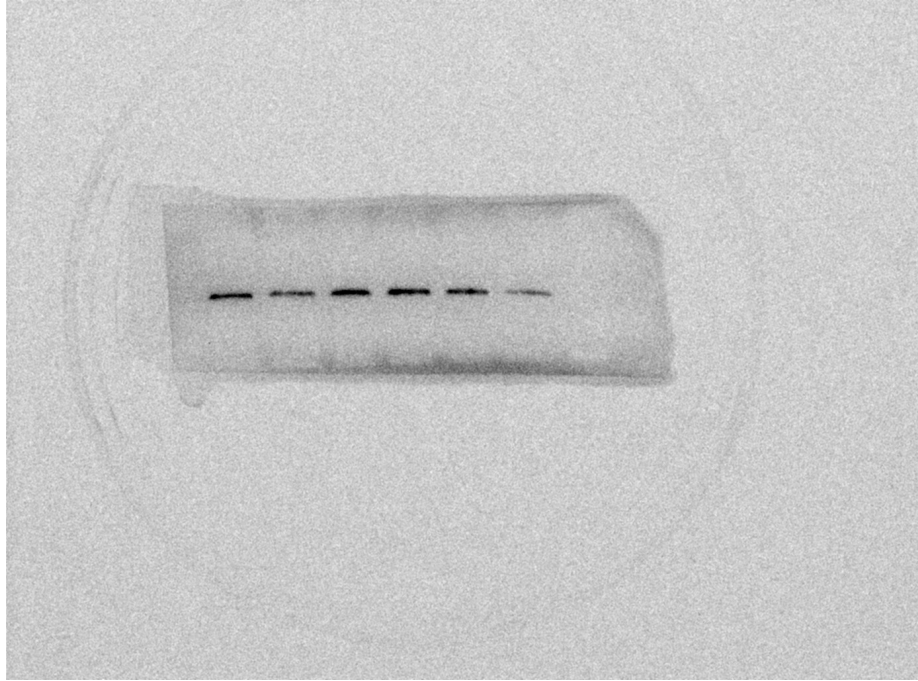

Figure 21. Original western-blot figure of Figure 9 in manuscript. CDLF, p-p38. From left to right: quality control sample, non-treated control group, TNF- $\alpha$  group, CDLF (100  $\mu\text{g/mL}$ ) group, CDLF (200  $\mu\text{g/mL}$ ) group, CDLF (400  $\mu\text{g/mL}$ ) group.

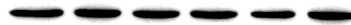

Figure 22. Original western-blot figure of Figure 9 in manuscript. CQAF,  $\beta$ -actin. From left to right: non-treated control group, TNF- $\alpha$  group, CQAF (100  $\mu\text{g/mL}$ ) group, CQAF (200  $\mu\text{g/mL}$ ) group, CQAF (400  $\mu\text{g/mL}$ ) group, quality control sample

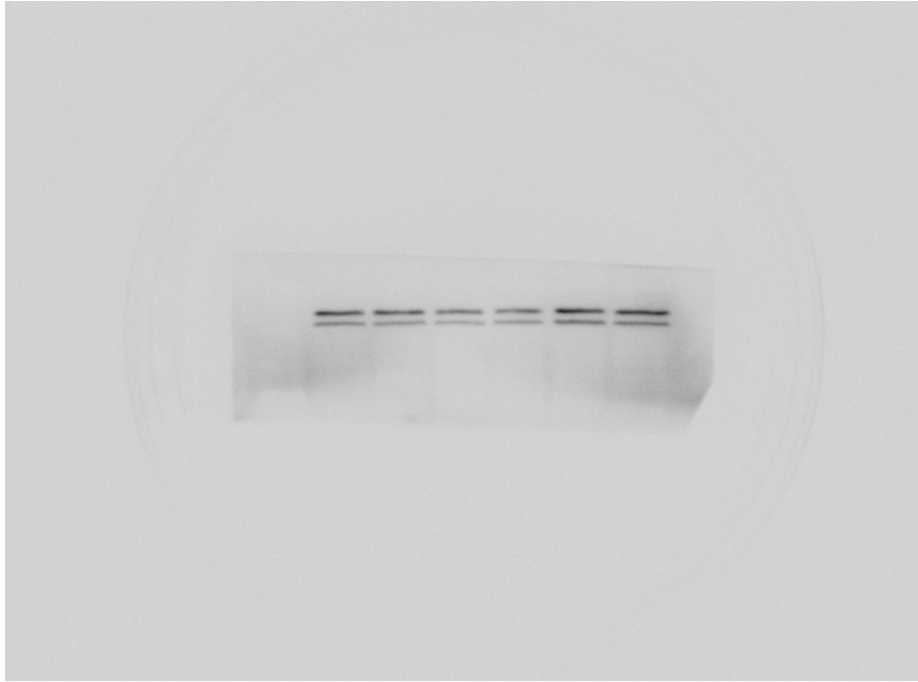

Figure 23. Original western-blot figure of Figure 9 in manuscript. CQAF, ERK<sub>1/2</sub>. From left to right: quality control sample, non-treated control group, TNF- $\alpha$  group, CQAF (100  $\mu$ g/mL) group, CQAF (200  $\mu$ g/mL) group, CQAF (400  $\mu$ g/mL) group.

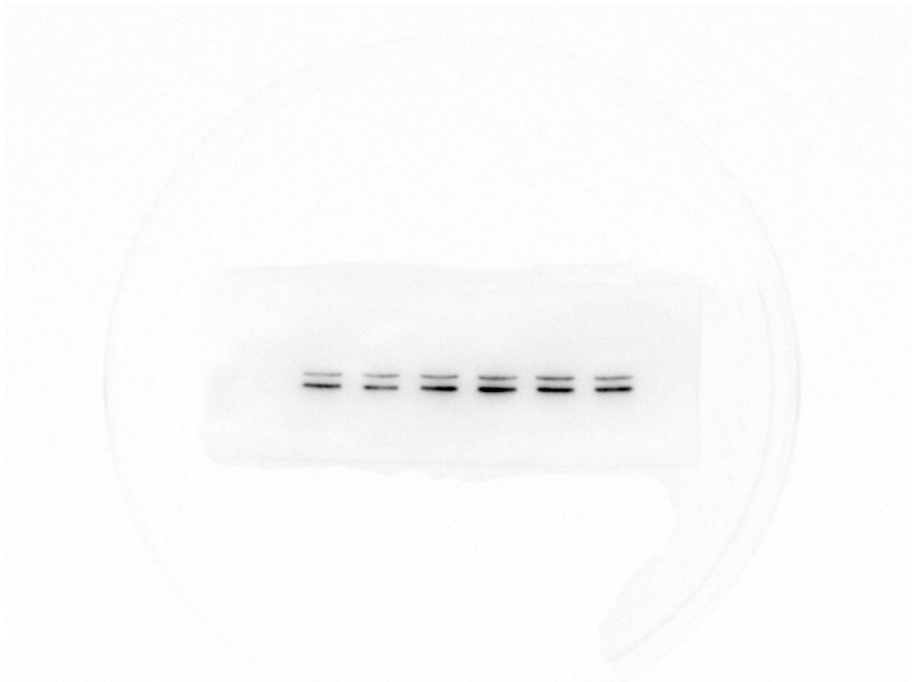

Figure 24. Original western-blot figure of Figure 9 in manuscript. CQAF, JNK. From left to right: non-treated control group, TNF- $\alpha$  group, CQAF (100  $\mu$ g/mL) group, CQAF (200  $\mu$ g/mL) group, CQAF (400  $\mu$ g/mL) group, quality control sample.

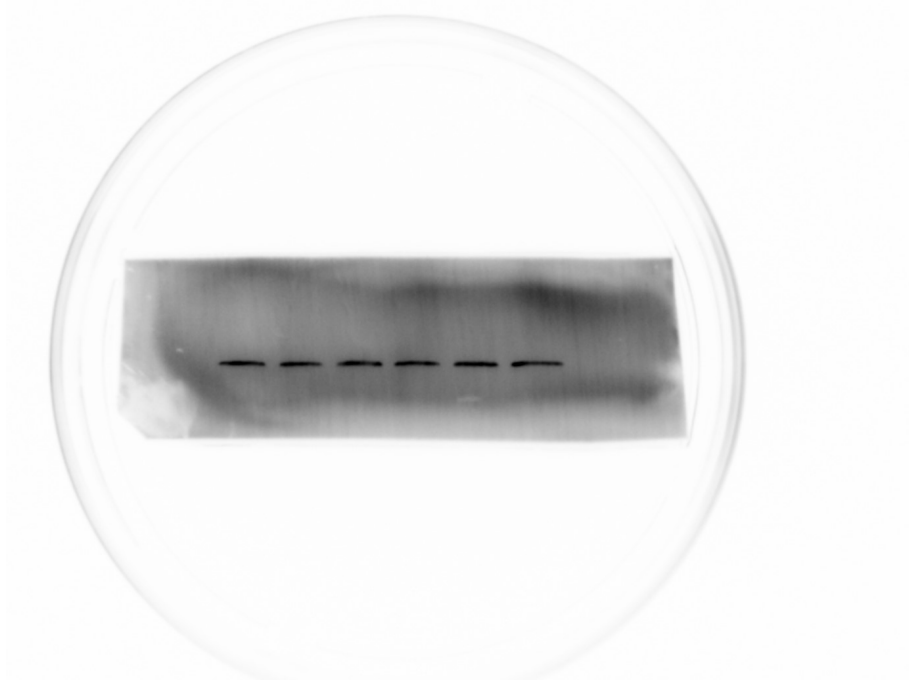

Figure 25. Original western-blot figure of Figure 9 in manuscript. CQAF, p38. From left to right: non-treated control group, TNF- $\alpha$  group, CQAF (100  $\mu\text{g/mL}$ ) group, CQAF (200  $\mu\text{g/mL}$ ) group, CQAF (400  $\mu\text{g/mL}$ ) group, quality control sample.

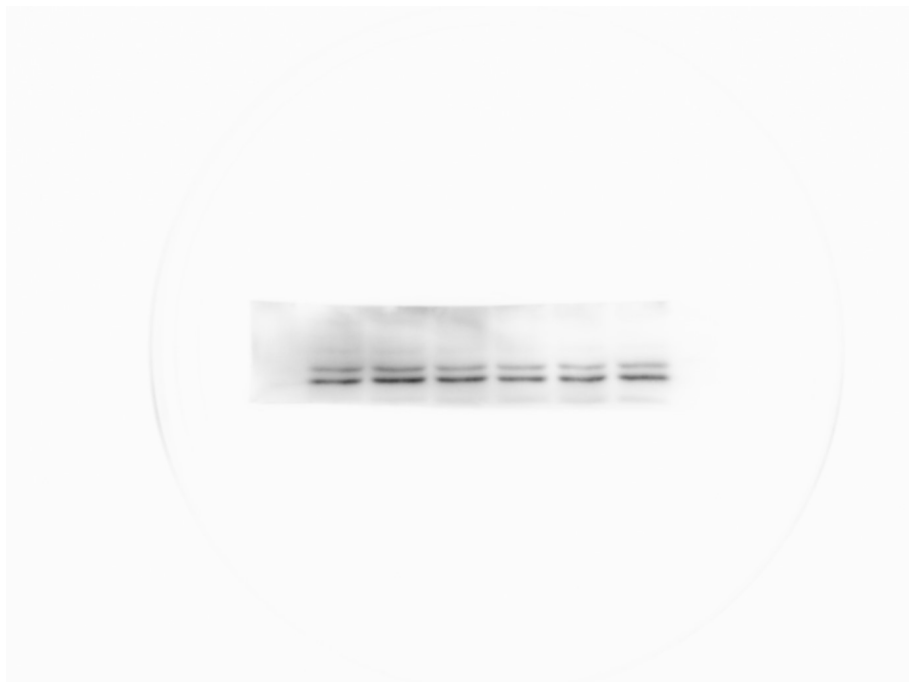

Figure 26. Original western-blot figure of Figure 9 in manuscript. CQAF, p-ERK<sub>1/2</sub>. From left to right: non-treated control group, TNF- $\alpha$  group, CQAF (100  $\mu\text{g/mL}$ ) group, CQAF (200  $\mu\text{g/mL}$ ) group, CQAF (400  $\mu\text{g/mL}$ ) group, quality control sample.

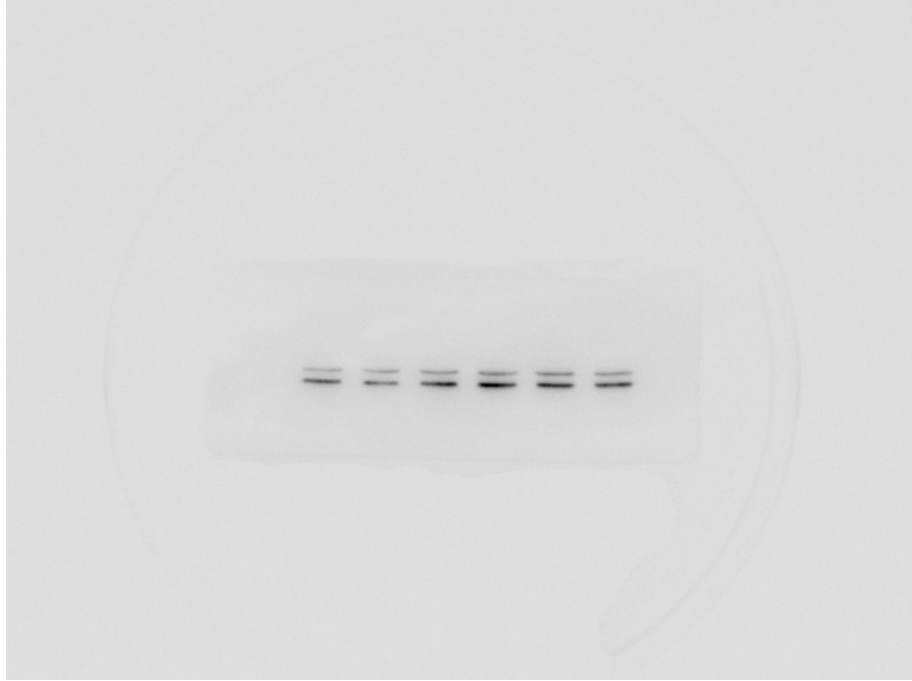

Figure 27. Original western-blot figure of Figure 9 in manuscript. CQAF, p-JNK. From left to right: quality control sampl, non-treated control group, TNF- $\alpha$  group, CQAF (100  $\mu\text{g/mL}$ ) group, CQAF (200  $\mu\text{g/mL}$ ) group, CQAF (400  $\mu\text{g/mL}$ ) group.

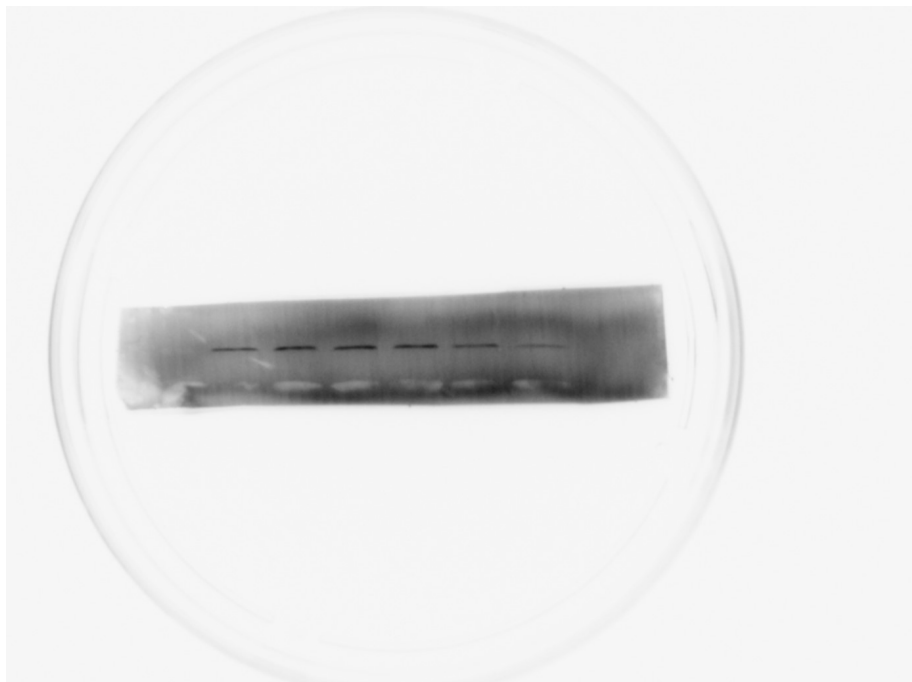

Figure 28. Original western-blot figure of Figure 9 in manuscript. CQAF, p-p38. From left to right: non-treated control group, TNF- $\alpha$  group, CQAF (100  $\mu\text{g/mL}$ ) group, CQAF (200  $\mu\text{g/mL}$ ) group, CQAF (400  $\mu\text{g/mL}$ ) group, quality control sample.

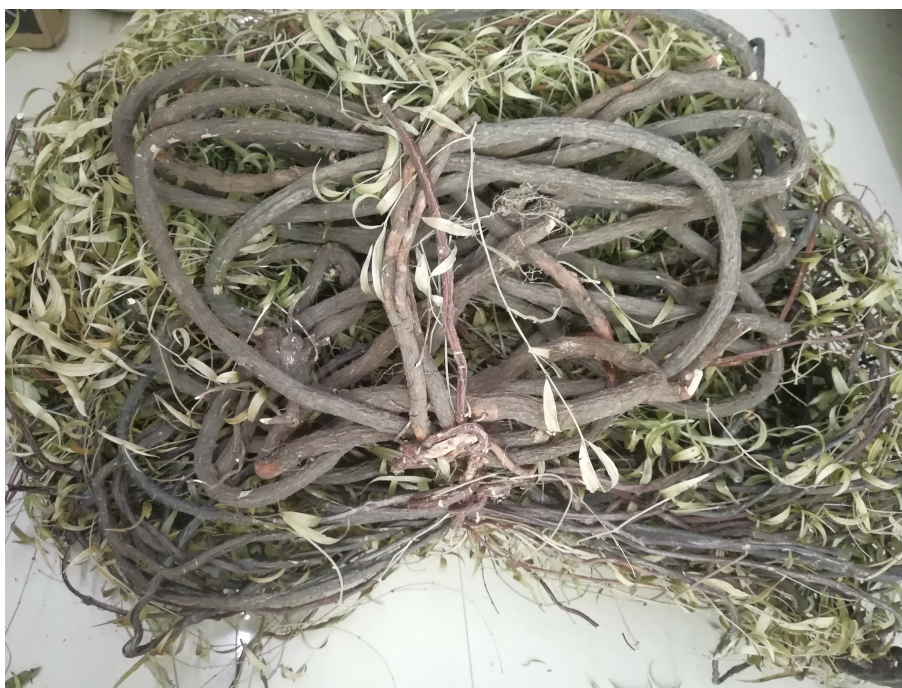

Figure 29. Whole plant of *Periploca forrestii* used in the present study.

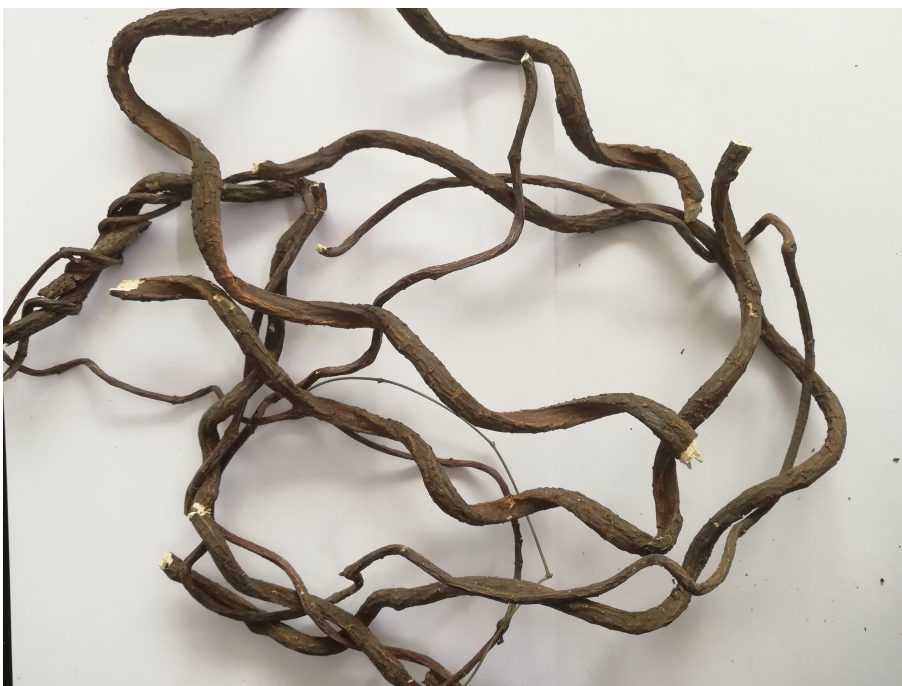

Figure 30. Stalks of *Periploca forrestii* used in the present study.

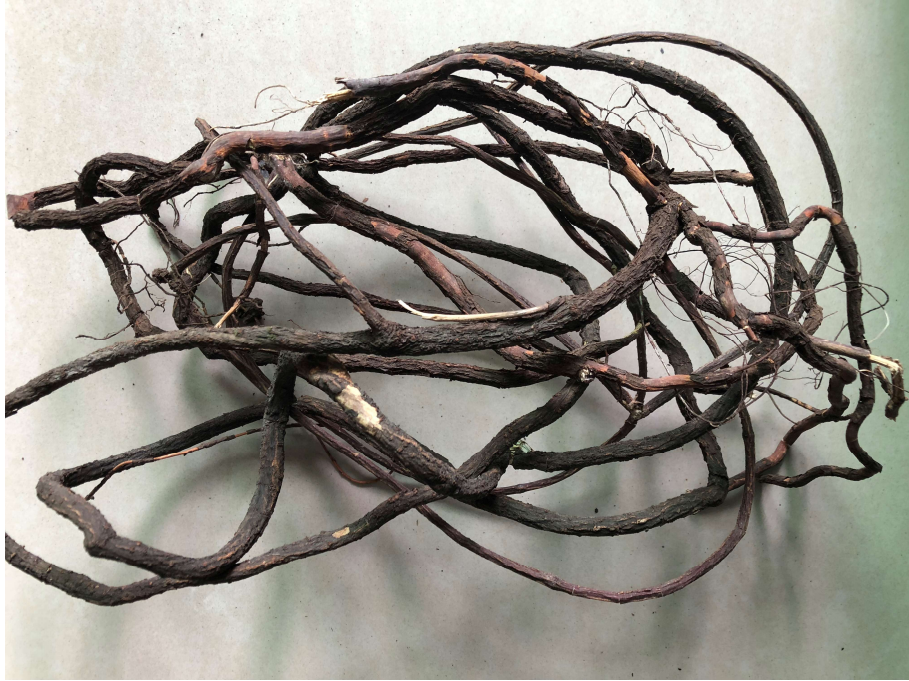

Figure 31. Roots and stalks of *Periploca forrestii* used in the present study.

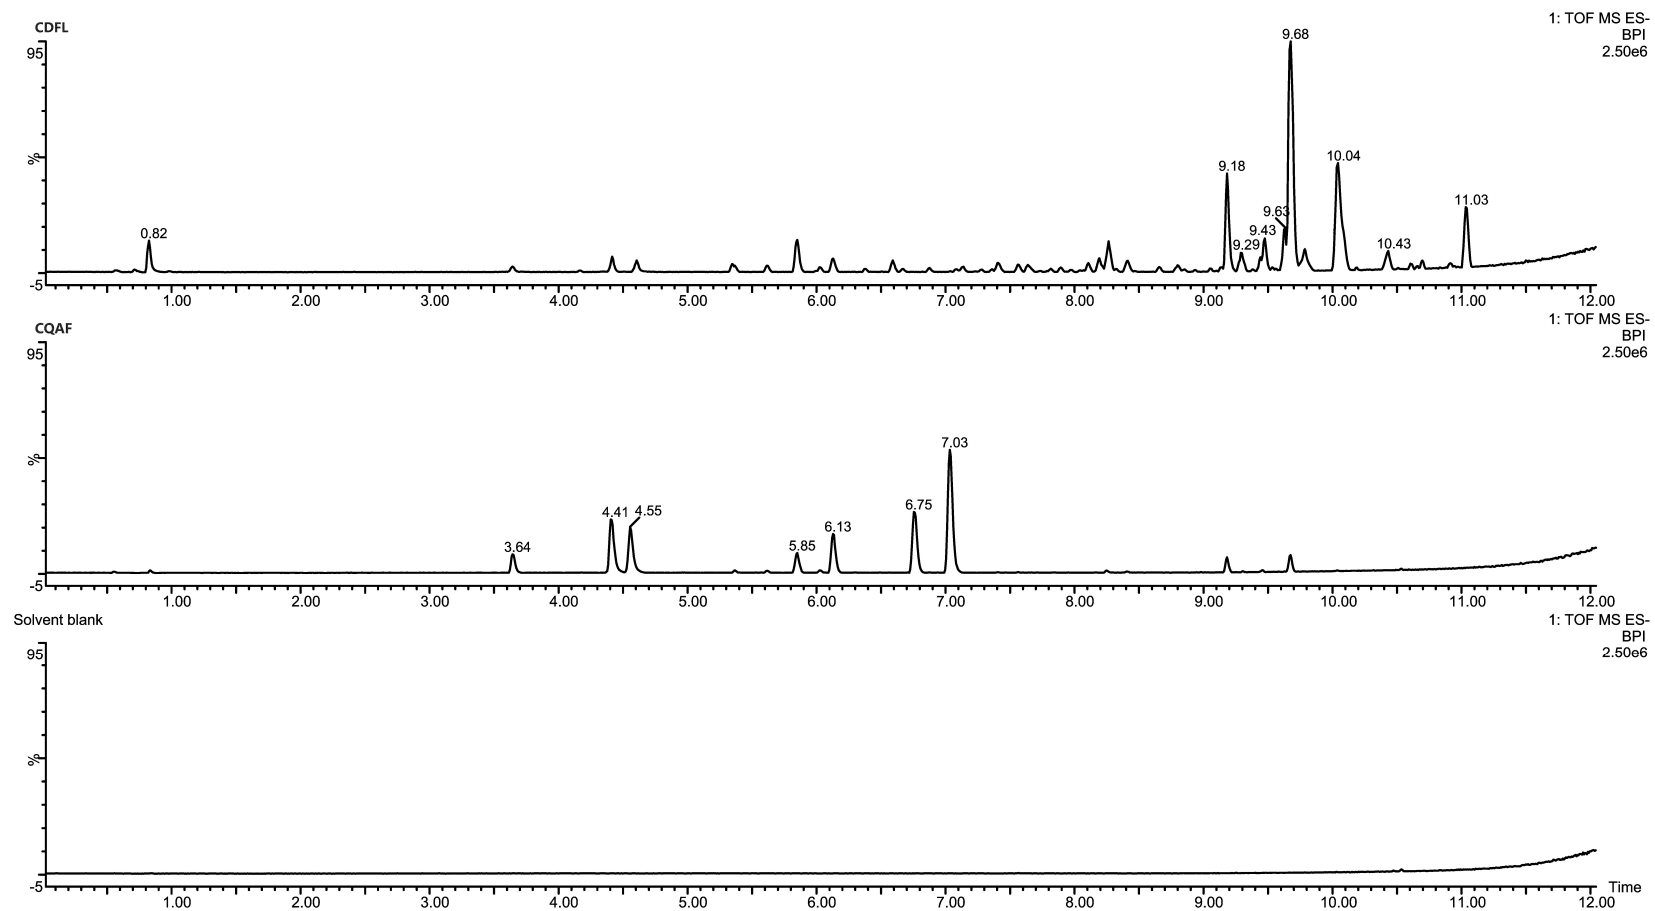

Figure 32. UPLC-QTOF-MS chromatograms of CDFL (0.5 mg/mL) and CQAF (0.05 mg/mL). Negative ion mode.

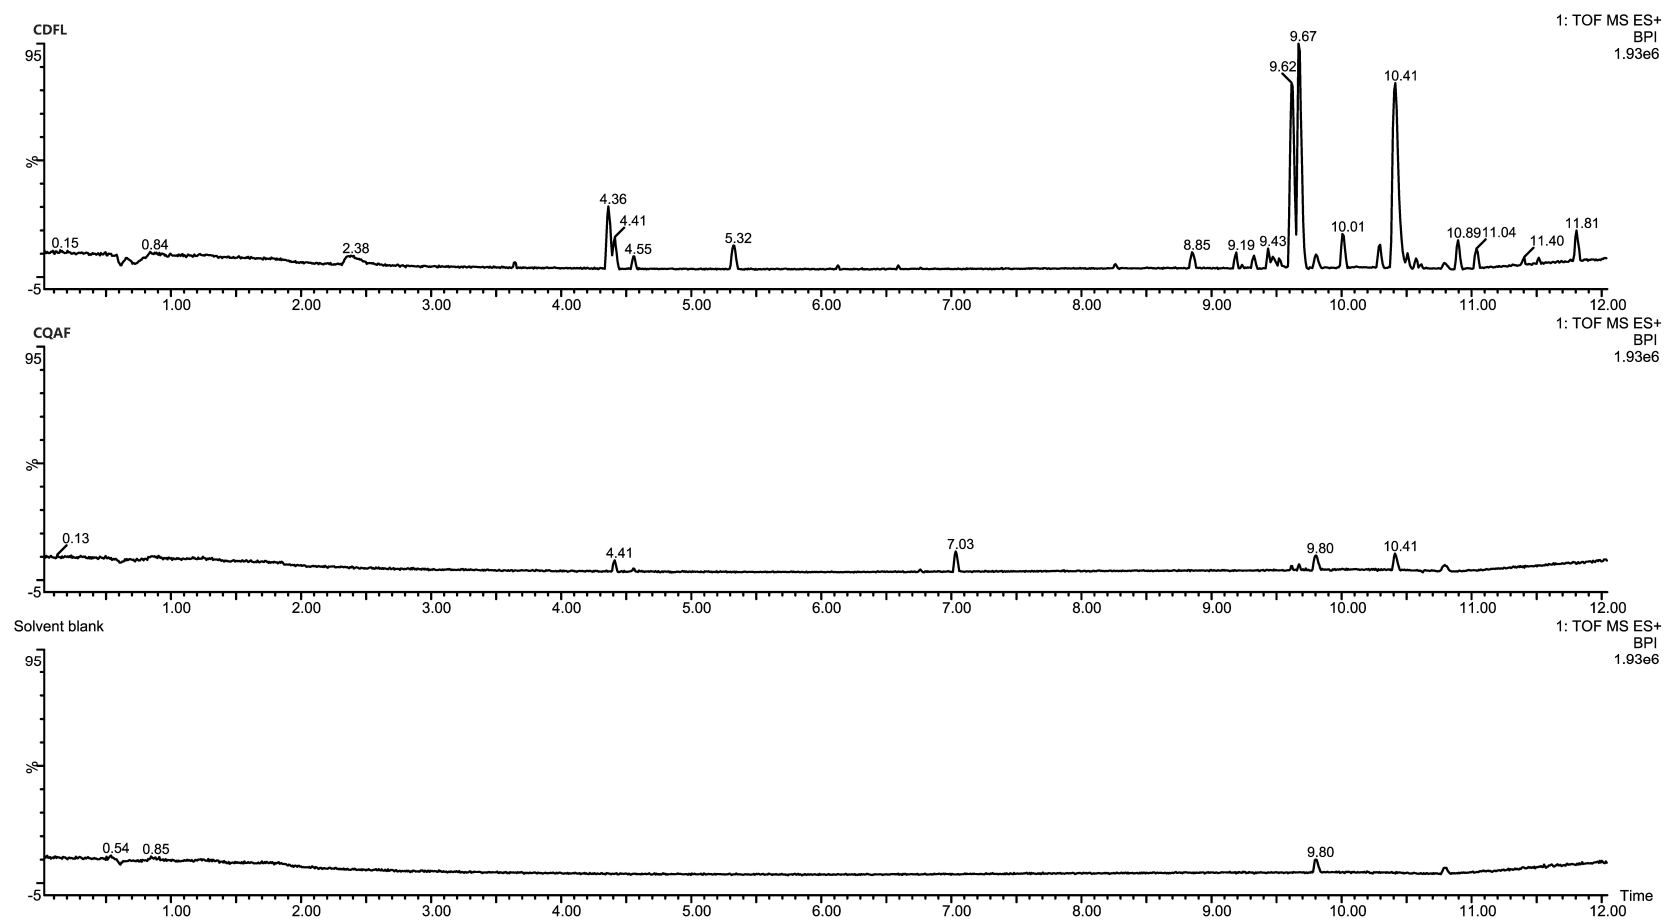

Figure 33. UPLC-QTOF-MS chromatograms of CDFL (0.5 mg/mL) and CQAF (0.05 mg/mL). Positive ion mode.
